# Supplementary material for: Effectiveness, safety, and patterns of use of camrelizumab in advanced esophageal cancer: an individual patient data pooled analysis of 987 patients from three prospective cohort studies
Source: Springer Nature journal article supplement (doi:10.1007/s00262-025-03970-z), 2025-03-08
Supplement: MOESM1 [file 262_2025_3970_MOESM1_ESM.pdf]

---

## **Supplementary data**

**Supplementary Figure 1** Geographical distribution of patients included in the study.

**Supplementary Figure 2** Kaplan-Meier curves for time to treatment discontinuation.

**Supplementary Figure 3** Subgroup analyses of progression-free survival (PFS) in patients receiving camrelizumab in the first-line setting.

**Supplementary Figure 4** Subgroup analyses of overall survival (OS) in patients receiving camrelizumab in the first-line setting.

**Supplementary Figure 5** Subgroup analyses of progression-free survival (PFS) in patients receiving camrelizumab in the second line or later setting.

**Supplementary Figure 6** Subgroup analyses of overall survival (OS) in patients receiving camrelizumab in the second line or later setting.

**Supplementary Figure 7** Progression-free survival (PFS) and overall survival (OS) among patients of different age groups (<65, 65-75, and  $\geq 75$  years) in the first-line setting.

**Supplementary Figure 8** Progression-free survival (PFS) and overall survival (OS) among patients of different age groups (<65, 65-75, and  $\geq 75$  years) in the second-line or later setting.

**Supplementary Figure 9** Progression-free survival (PFS) and overall survival (OS) among patients of different Eastern Cooperative Oncology Group performance status (0-1, and  $\geq 2$ ) in the first-line setting.

**Supplementary Figure 10** Progression-free survival (PFS) and overall survival (OS) among patients of different Eastern Cooperative Oncology Group performance status (0-1, and  $\geq 2$ ) in the second-line or later setting.

**Supplementary Figure 11** Progression-free survival (PFS) and overall survival (OS) in

---

patients receiving camrelizumab combined with taxanes plus platinum (TP)- versus fluorouracil plus platinum (FP)-based chemotherapy in the first-line setting.

**Supplementary Figure 12** Progression-free survival (PFS) and overall survival (OS) in patients receiving camrelizumab monotherapy or combination therapy in the second-line or later setting.

**Supplementary Table 1** Summary of study design

**Supplementary Table 2** List of study sites

**Supplementary Table 3** Adverse events occurring in  $\geq 5\%$  of patients.

**Supplementary Table 4** Adverse events occurring in  $\geq 5\%$  of patients aged  $\geq 75$  years.

**Supplementary Table 5** Adverse events occurring in  $\geq 5\%$  of patients with an ECOG PS of  $\geq 2$ .

**Supplementary Table 6** Peripheral blood parameters used in Cox regression analyses

**Supplementary Table 7** Summary of effectiveness outcomes of camrelizumab for advanced esophageal cancer in this study and pivotal clinical trials.

**Supplementary Table 8** Multiple multivariable Cox regression model for overall survival analysis

**Supplementary Figure 1** Geographical distribution of patients included in the study.

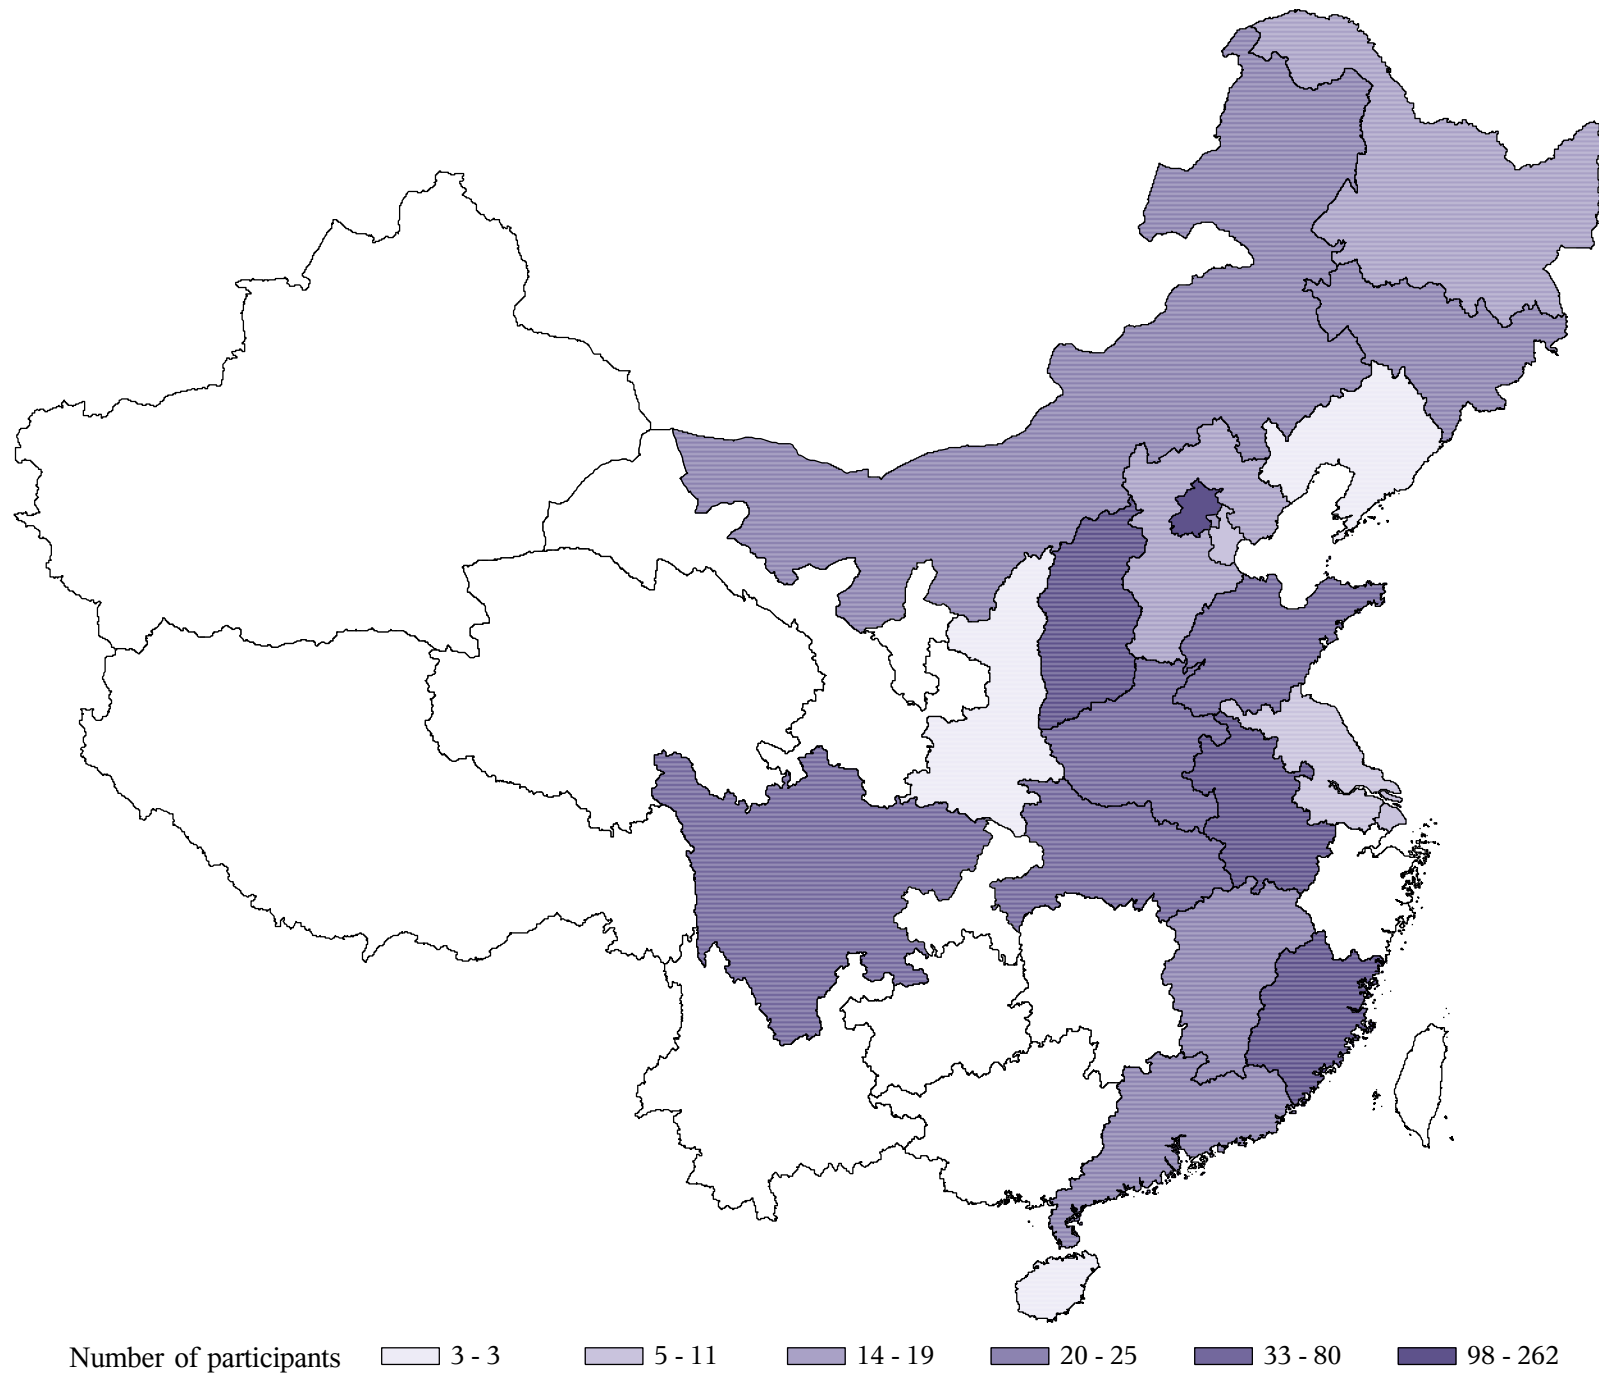

Supplementary Figure 2 Kaplan-Meier curves for time to treatment discontinuation.

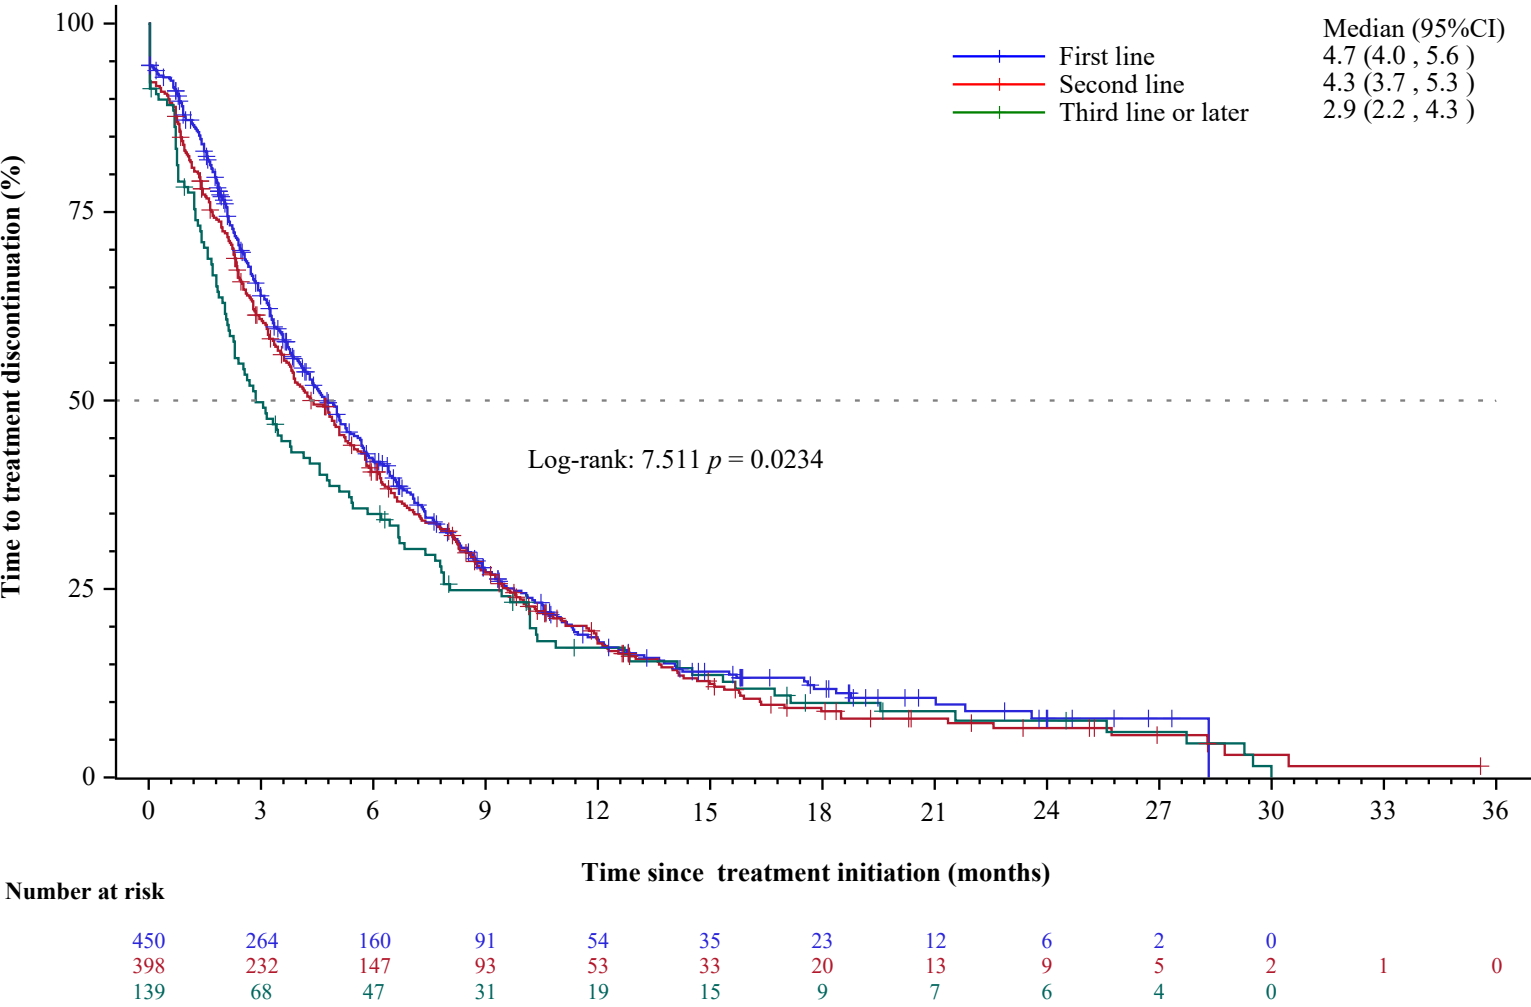

**Supplementary Figure 3** Subgroup analyses of progression-free survival (PFS) in patients receiving camrelizumab in the first-line setting.

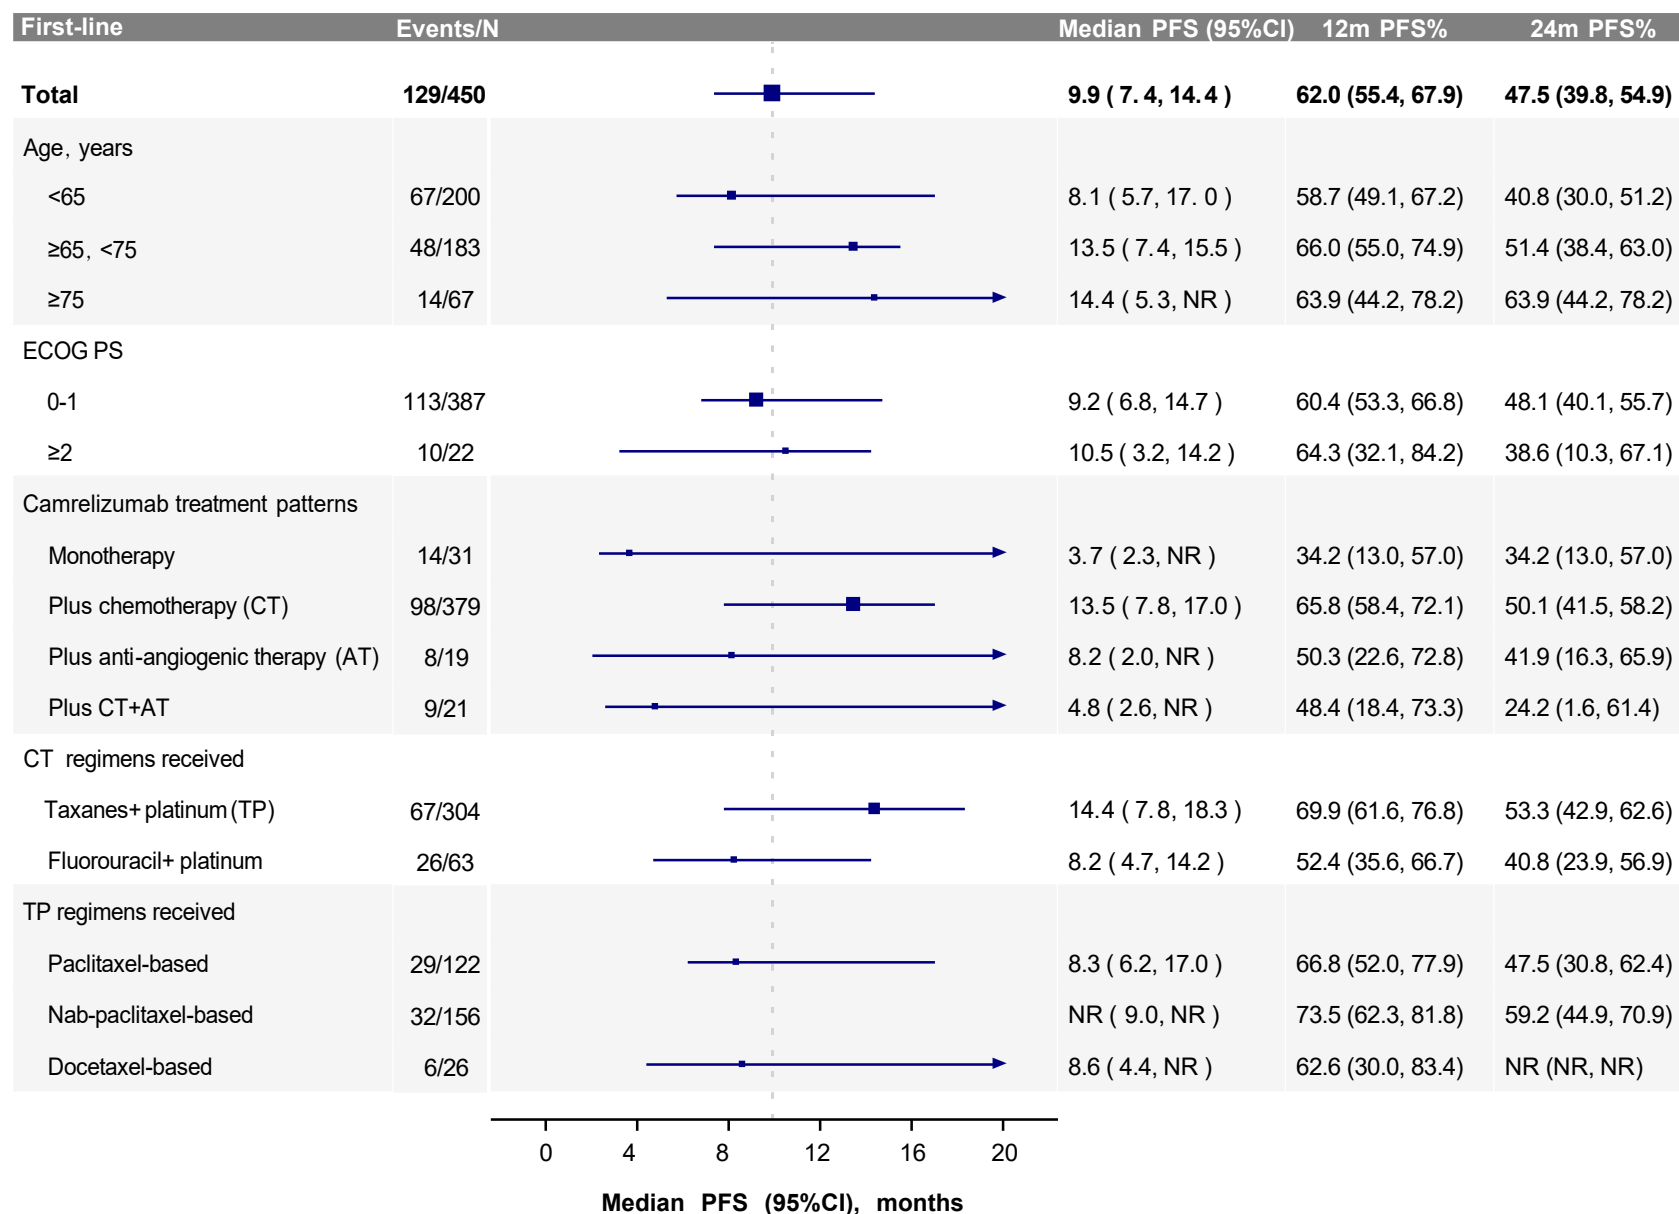

**Supplementary Figure 4** Subgroup analyses of overall survival (OS) in patients receiving camrelizumab in the first-line setting.

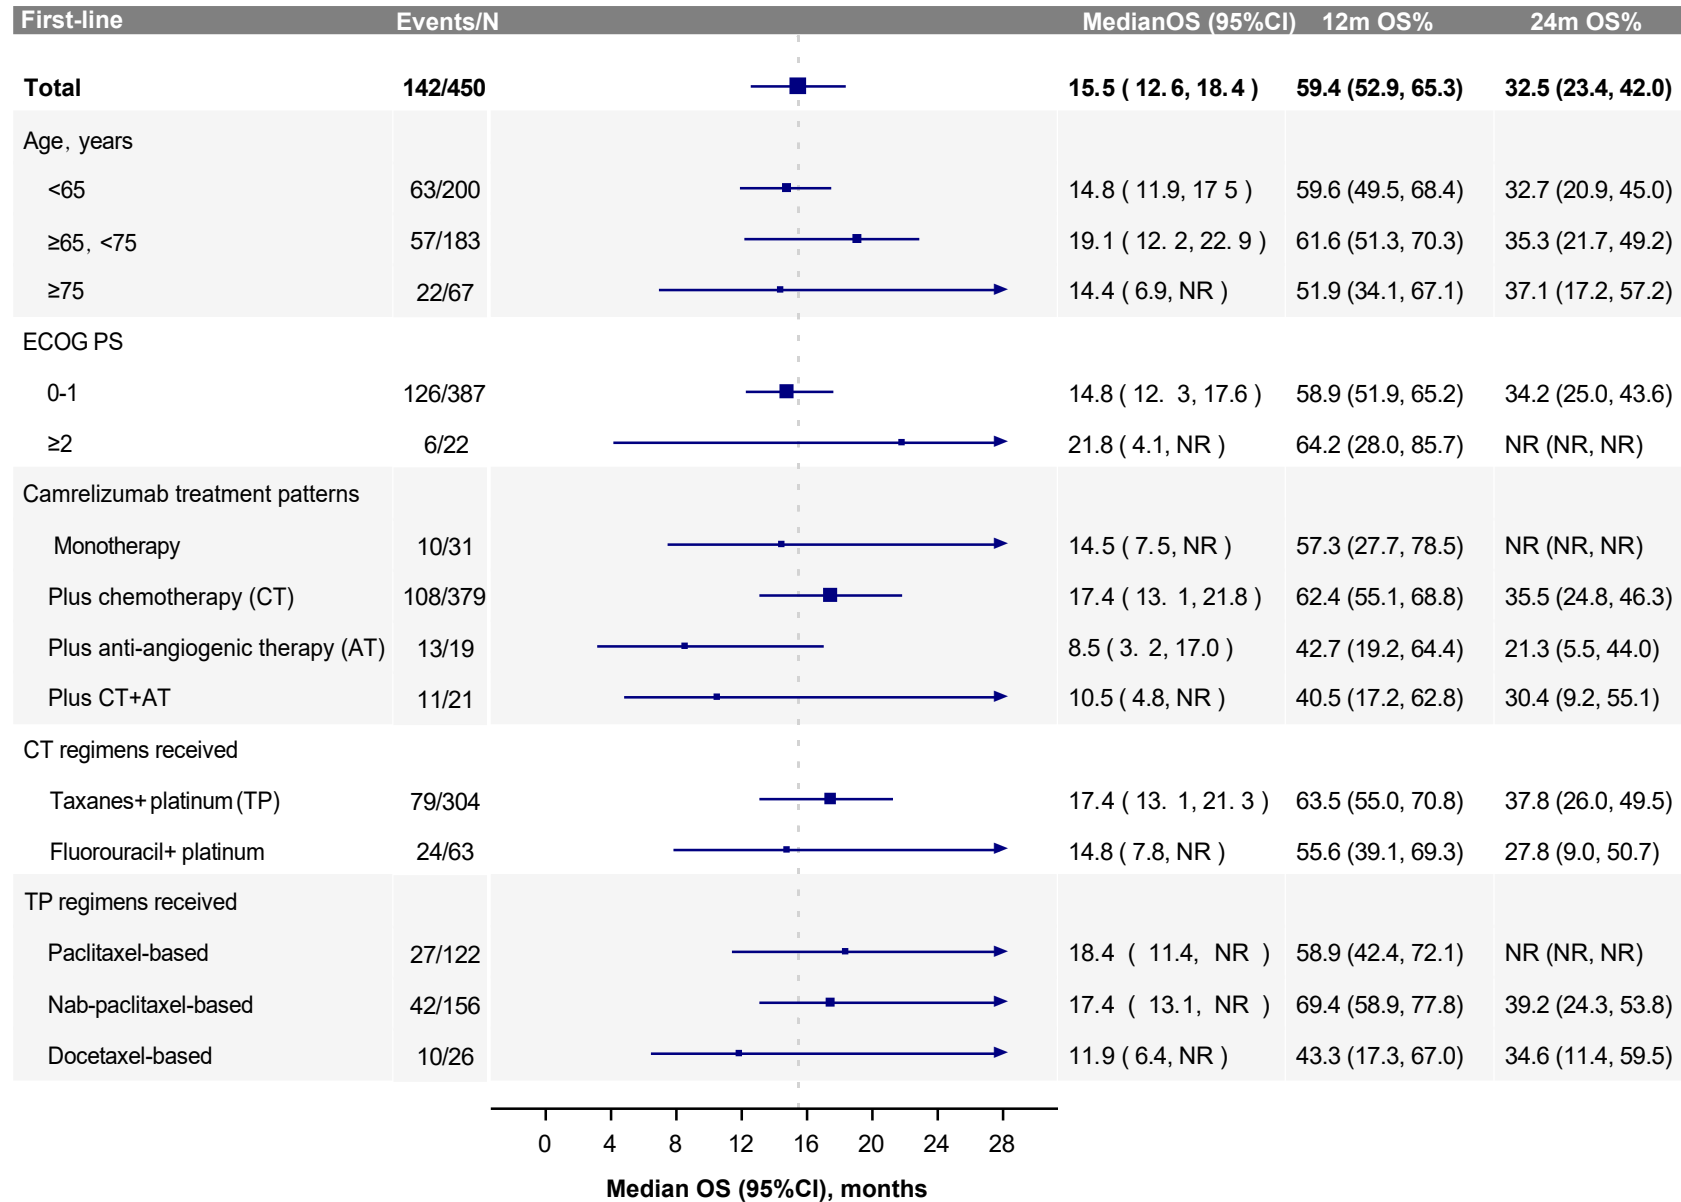

**Supplementary Figure 5** Subgroup analyses of progression-free survival (PFS) in patients receiving camrelizumab in the second line or later setting.

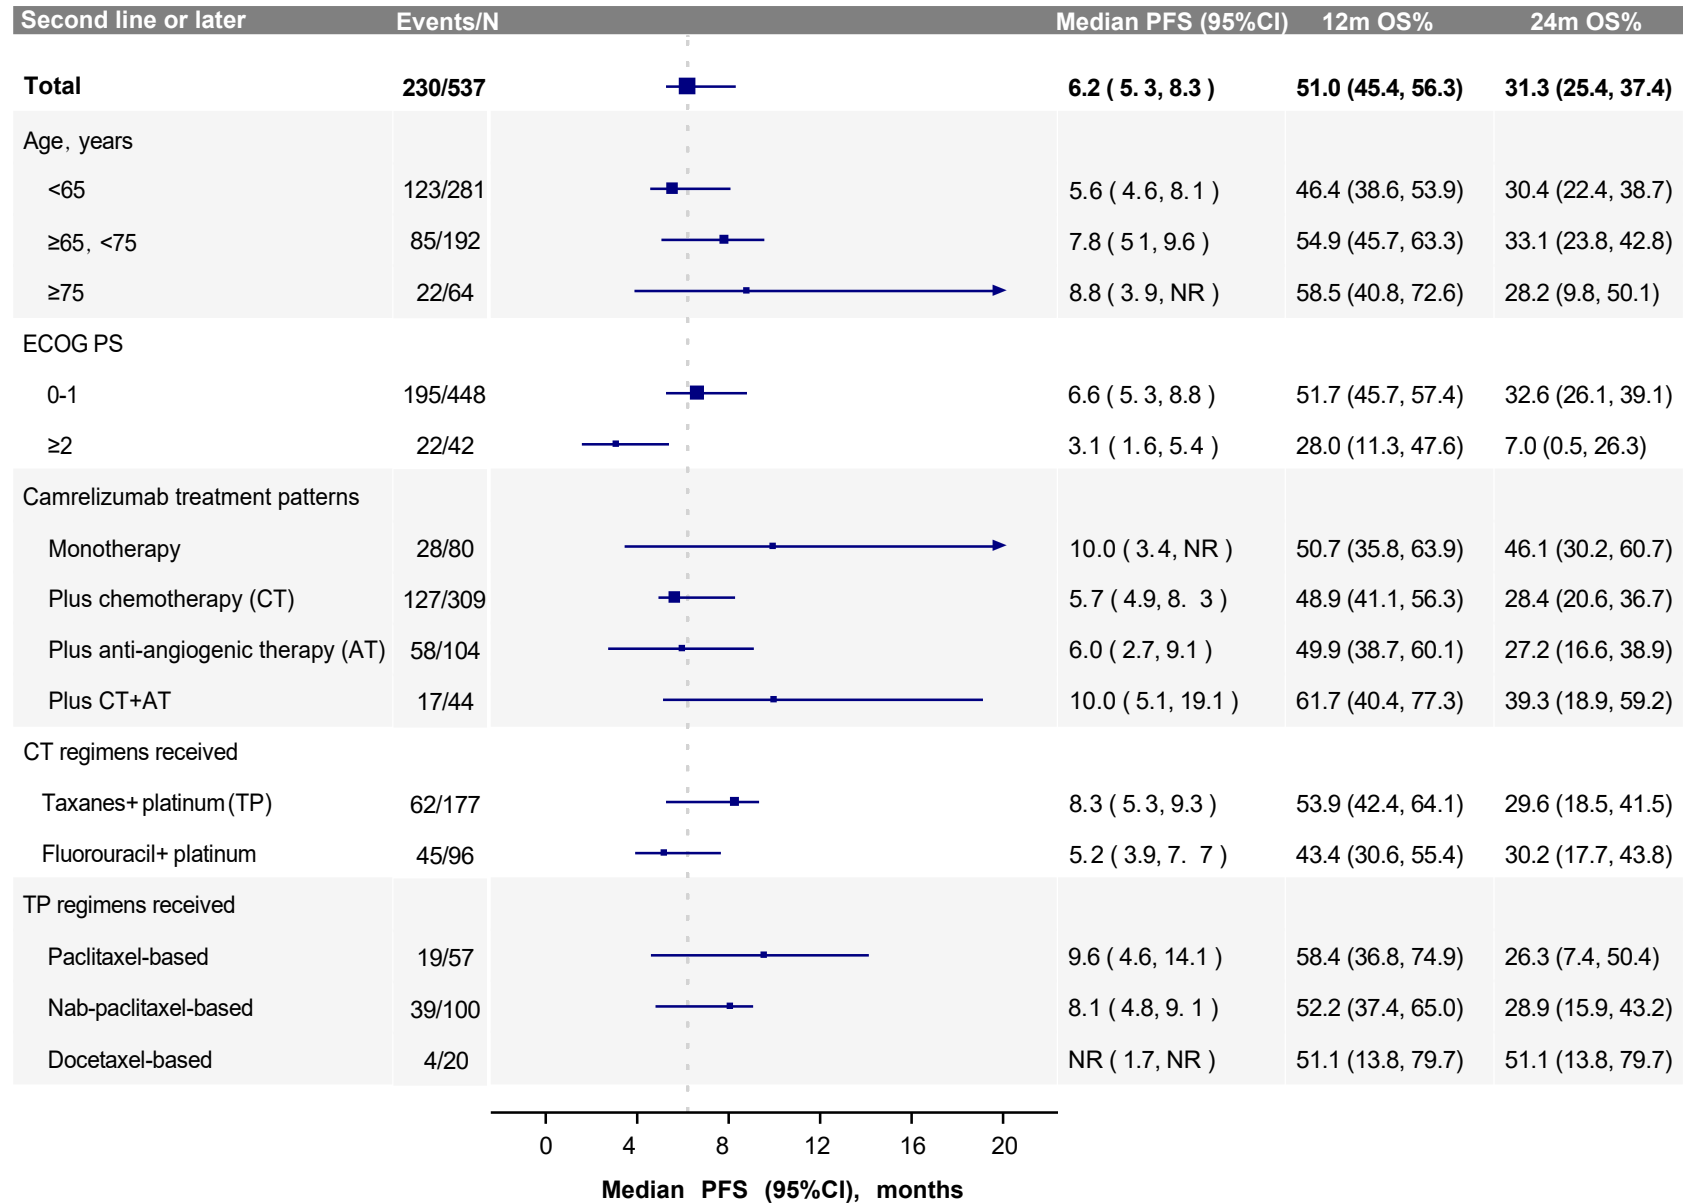

**Supplementary Figure 6** Subgroup analyses of overall survival (OS) in patients receiving camrelizumab in the second line or later setting.

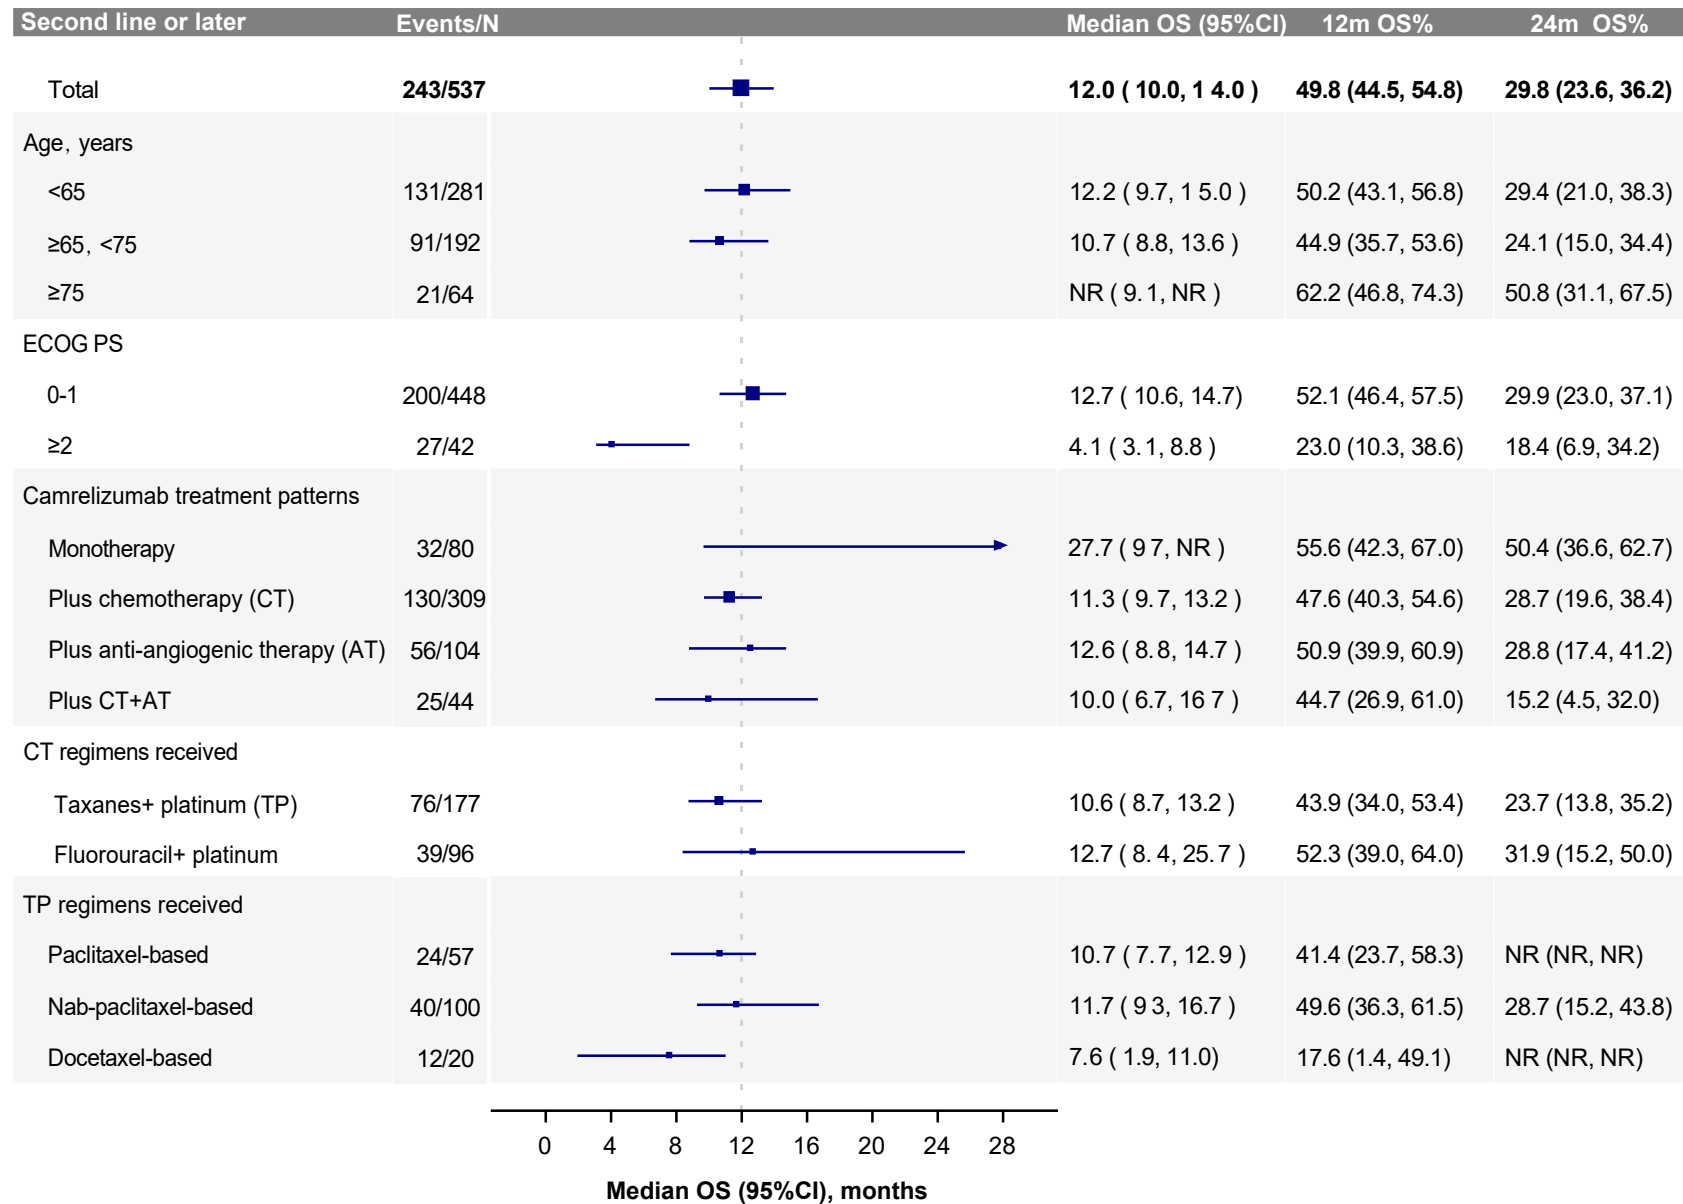



Supplementary Figure 7

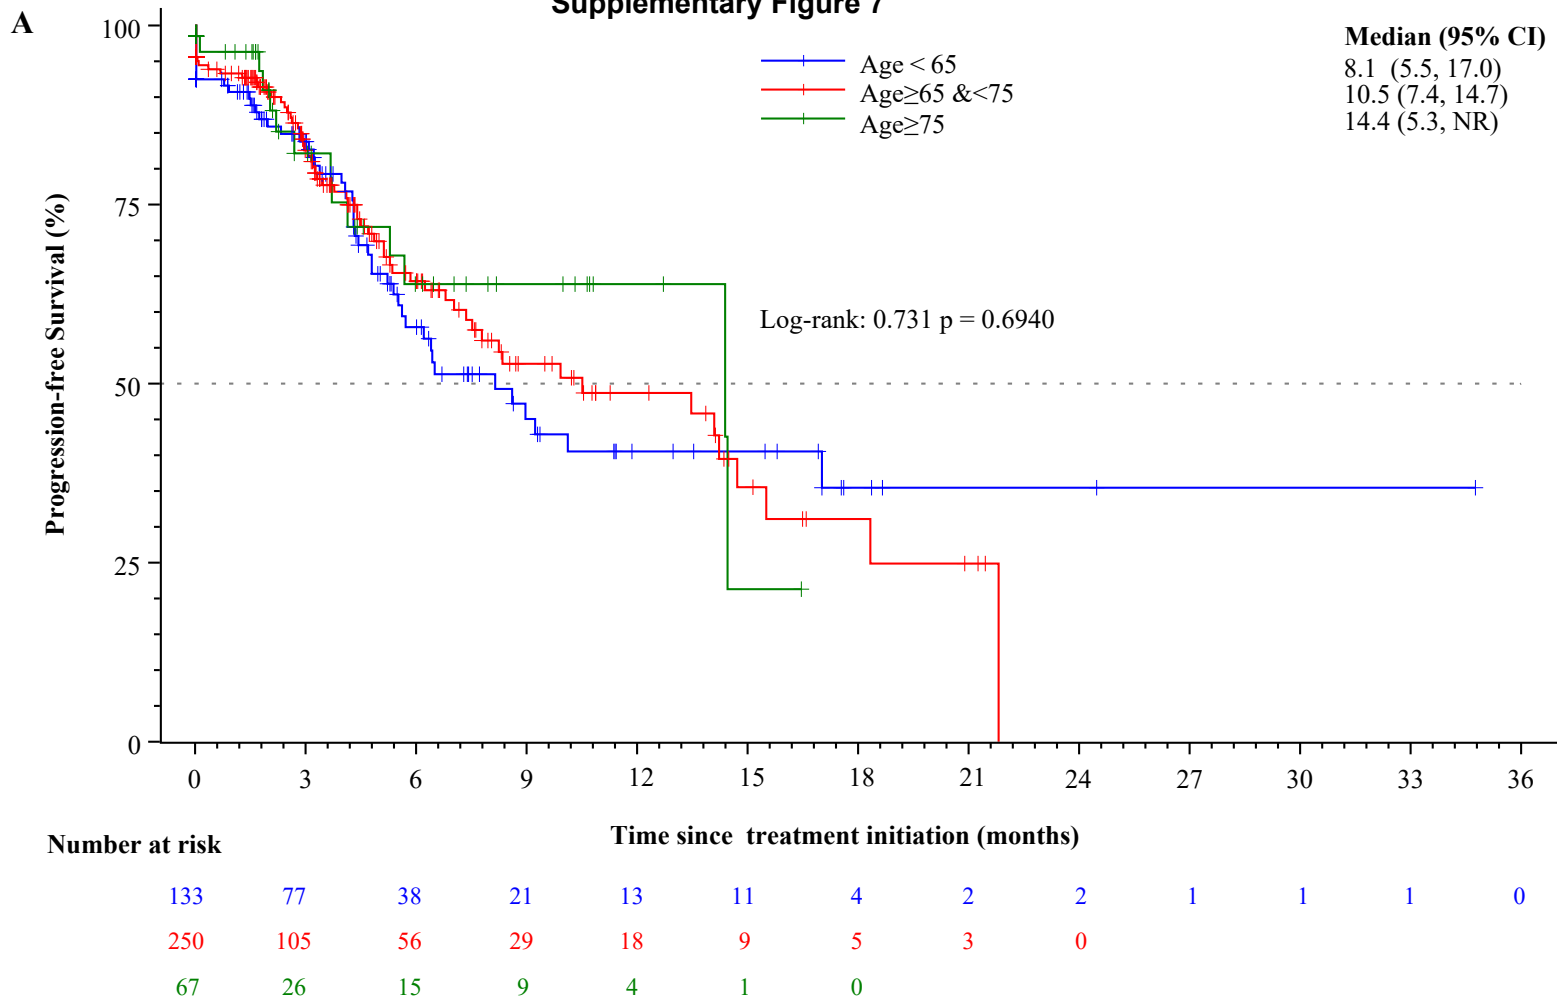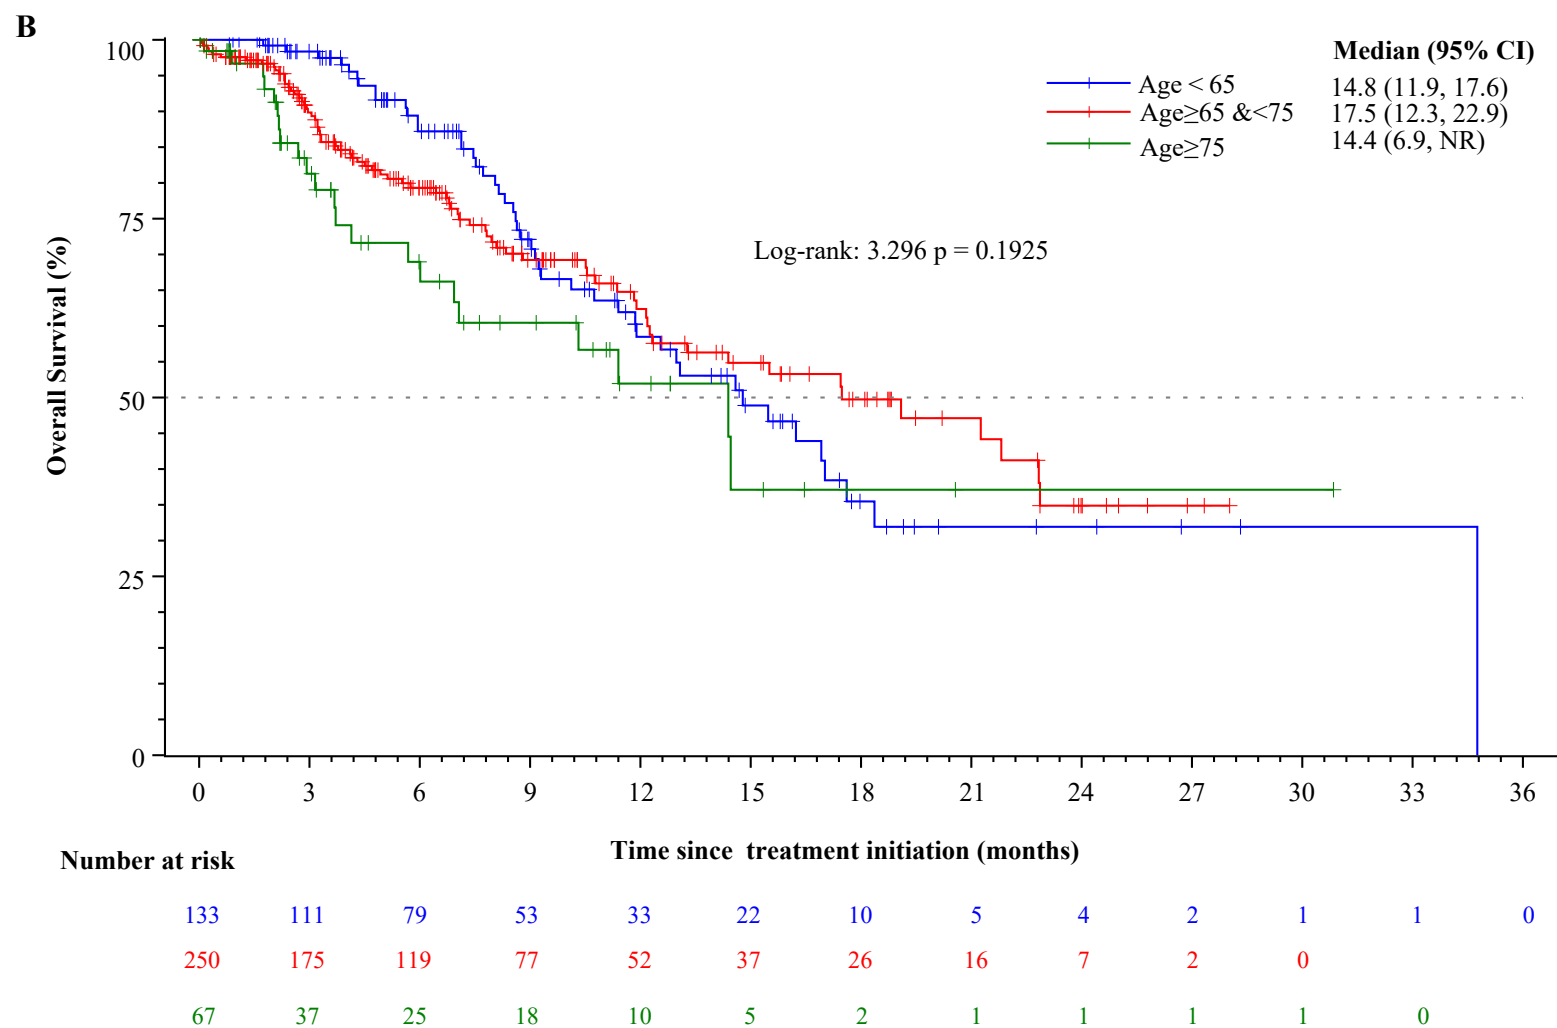

Supplementary Figure 8

A

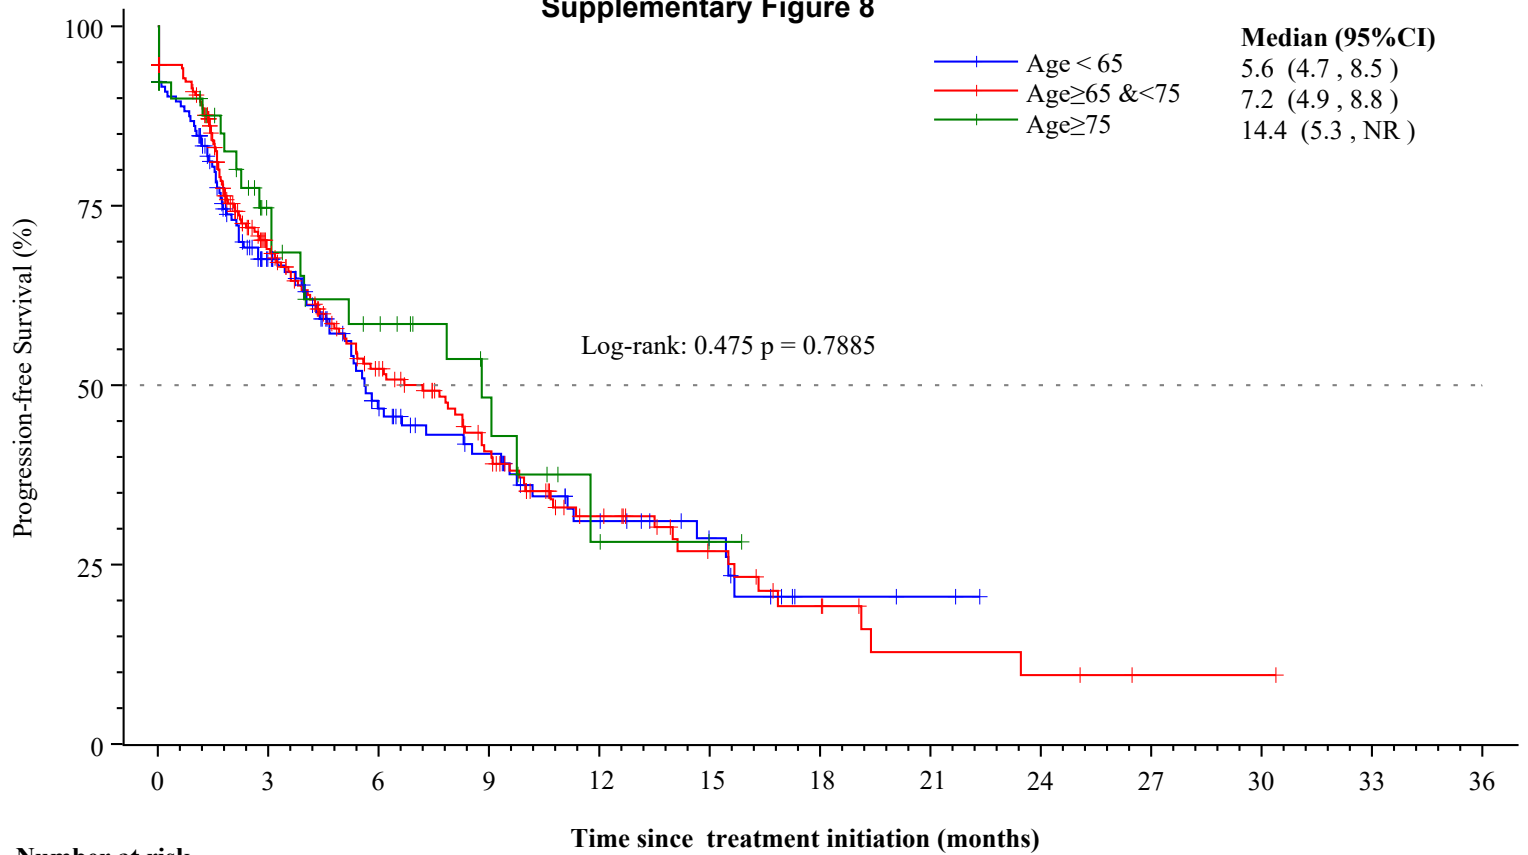

Number at risk

|     |     |    |    |    |    |   |   |   |   |   |   |  |
|-----|-----|----|----|----|----|---|---|---|---|---|---|--|
| 194 | 78  | 43 | 30 | 18 | 11 | 3 | 2 | 0 |   |   |   |  |
| 279 | 112 | 72 | 47 | 25 | 15 | 9 | 4 | 3 | 1 | 1 | 0 |  |
| 64  | 24  | 16 | 9  | 3  | 1  | 0 |   |   |   |   |   |  |

B

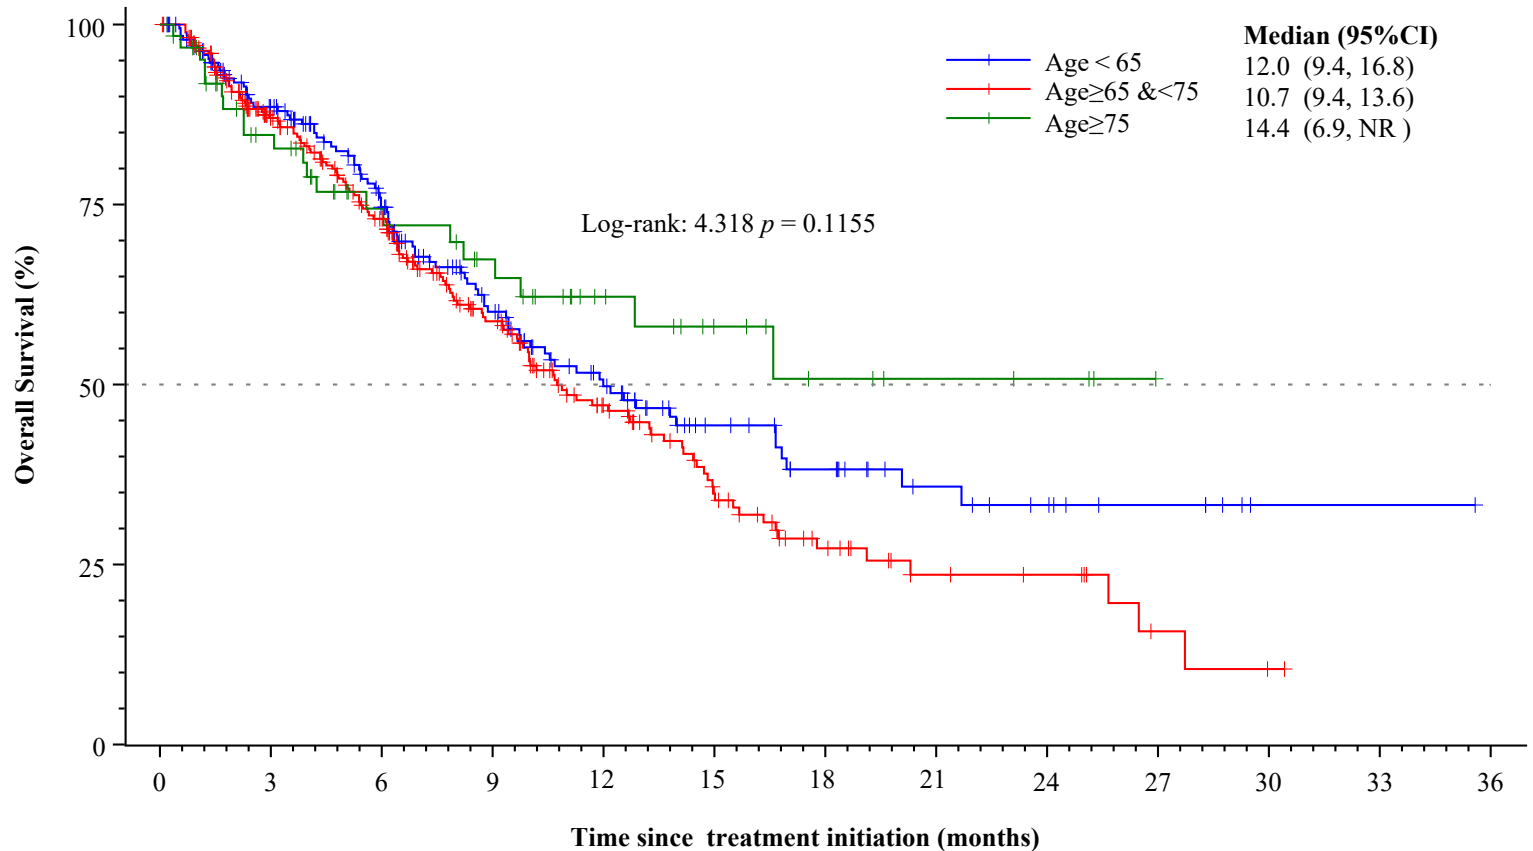

Number at risk

|     |     |     |     |    |    |    |    |    |   |   |   |   |
|-----|-----|-----|-----|----|----|----|----|----|---|---|---|---|
| 194 | 154 | 112 | 77  | 53 | 32 | 23 | 14 | 10 | 6 | 1 | 1 | 0 |
| 279 | 204 | 153 | 101 | 62 | 37 | 20 | 11 | 9  | 3 | 1 | 0 |   |
| 64  | 45  | 32  | 26  | 16 | 10 | 6  | 4  | 3  | 0 |   |   |   |

**A**

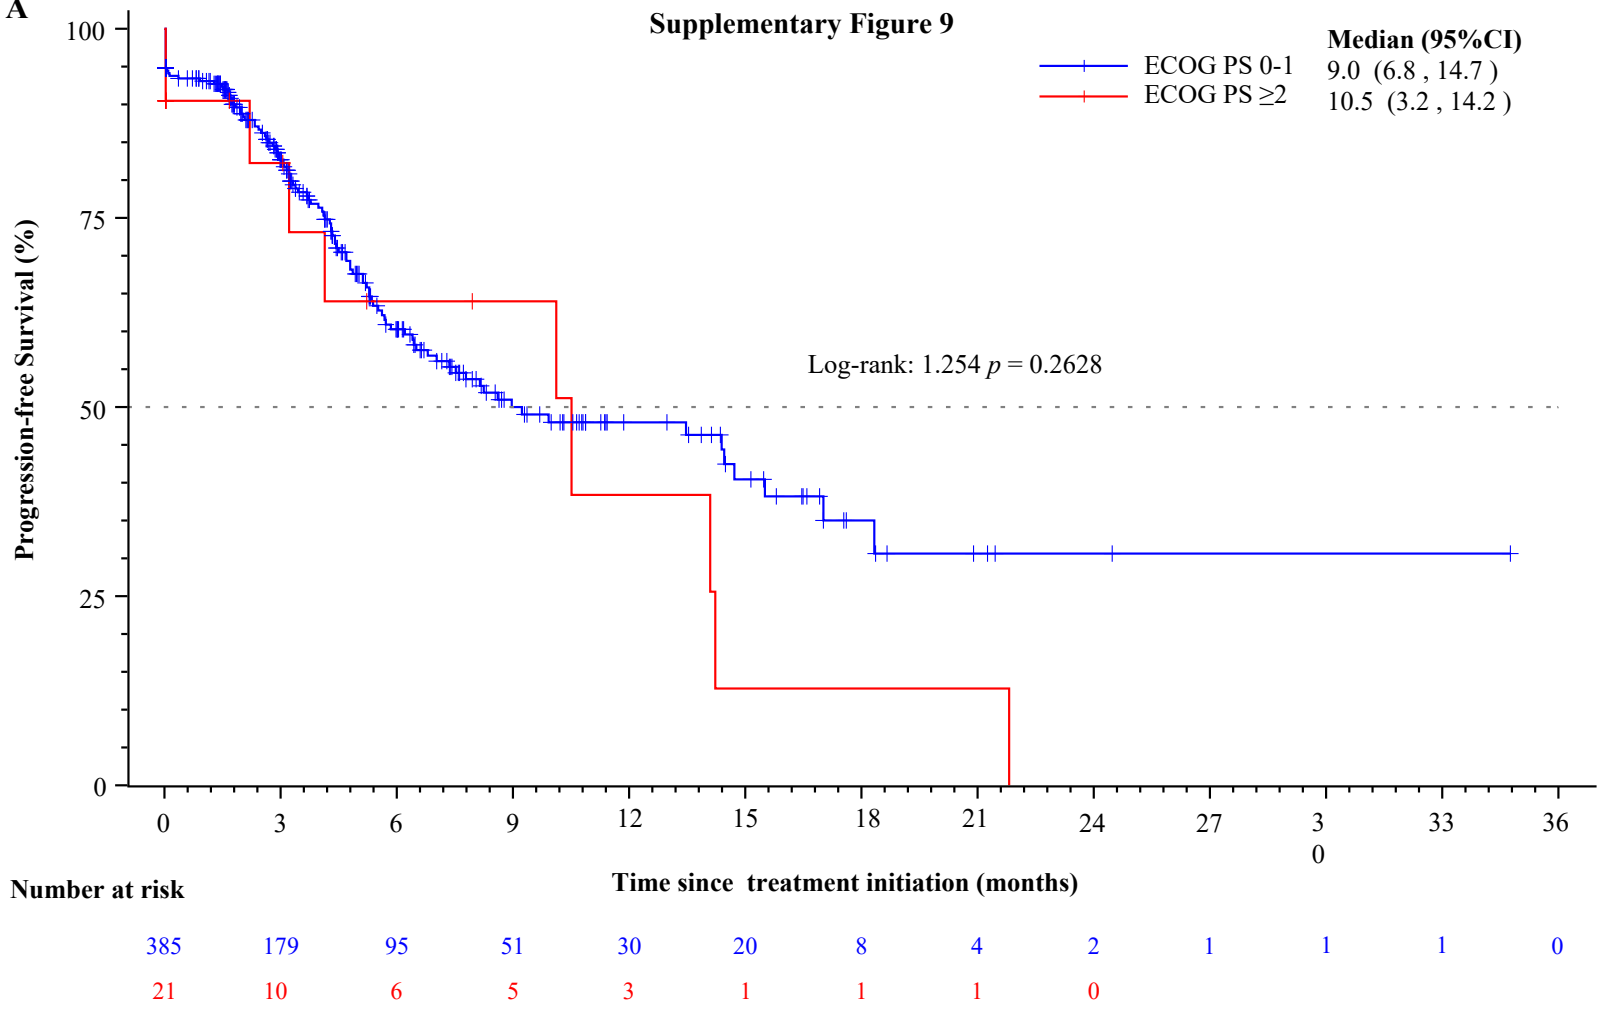

**B**

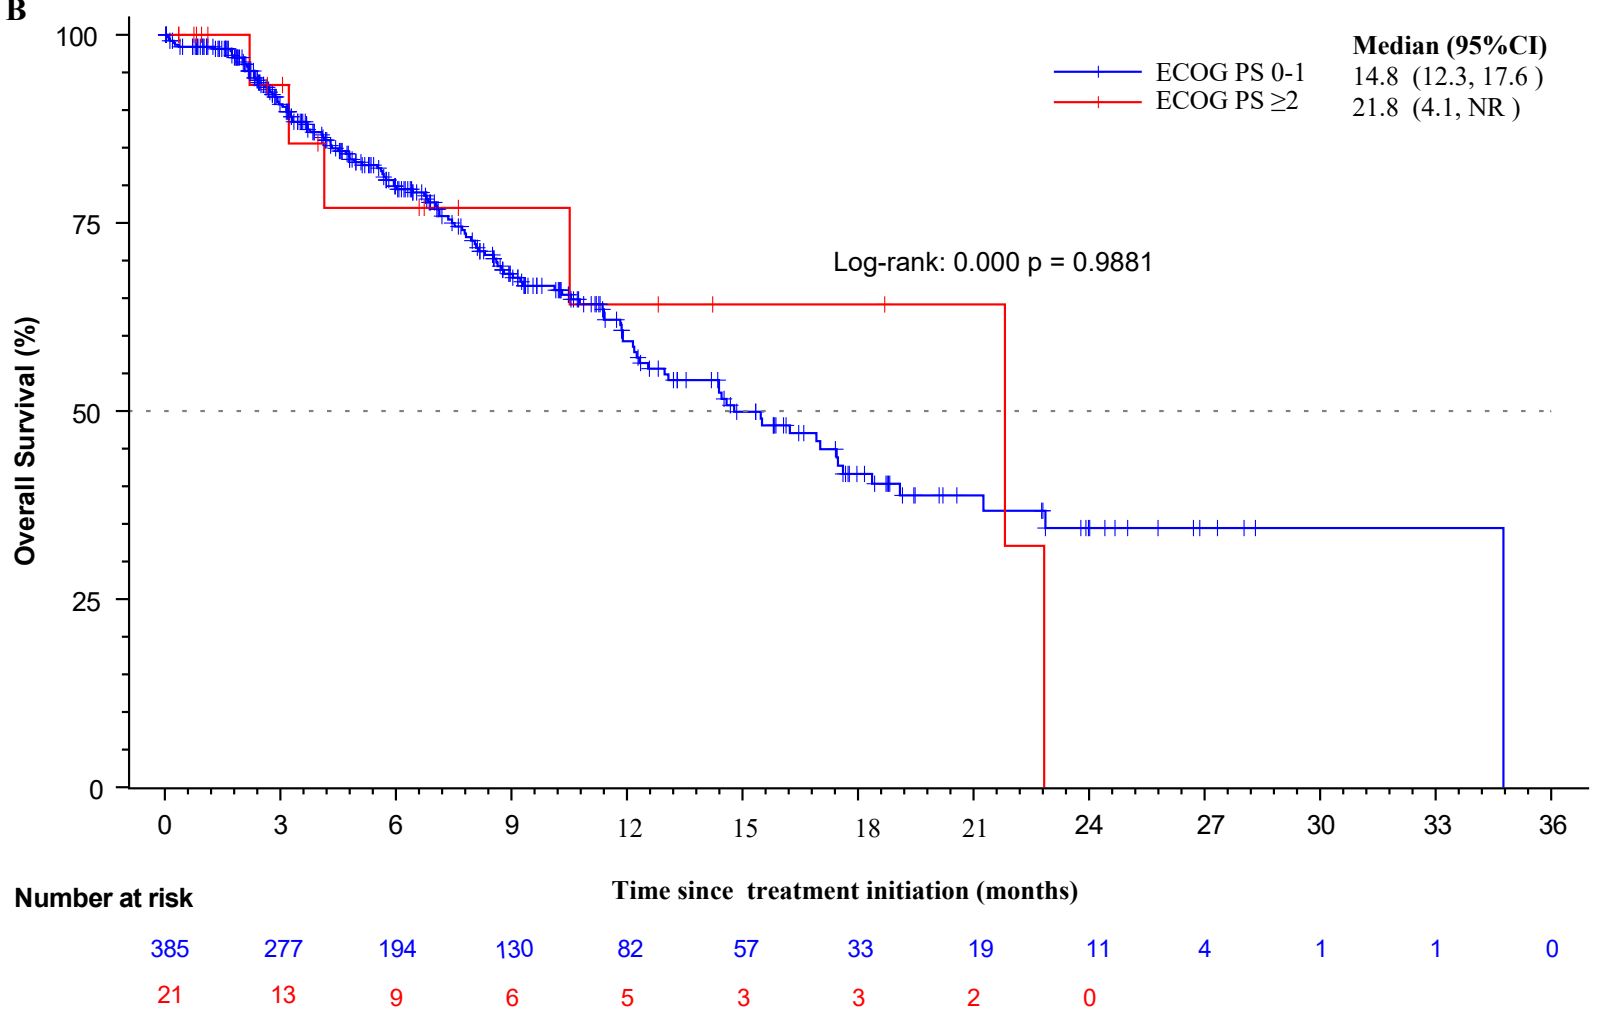

**A**

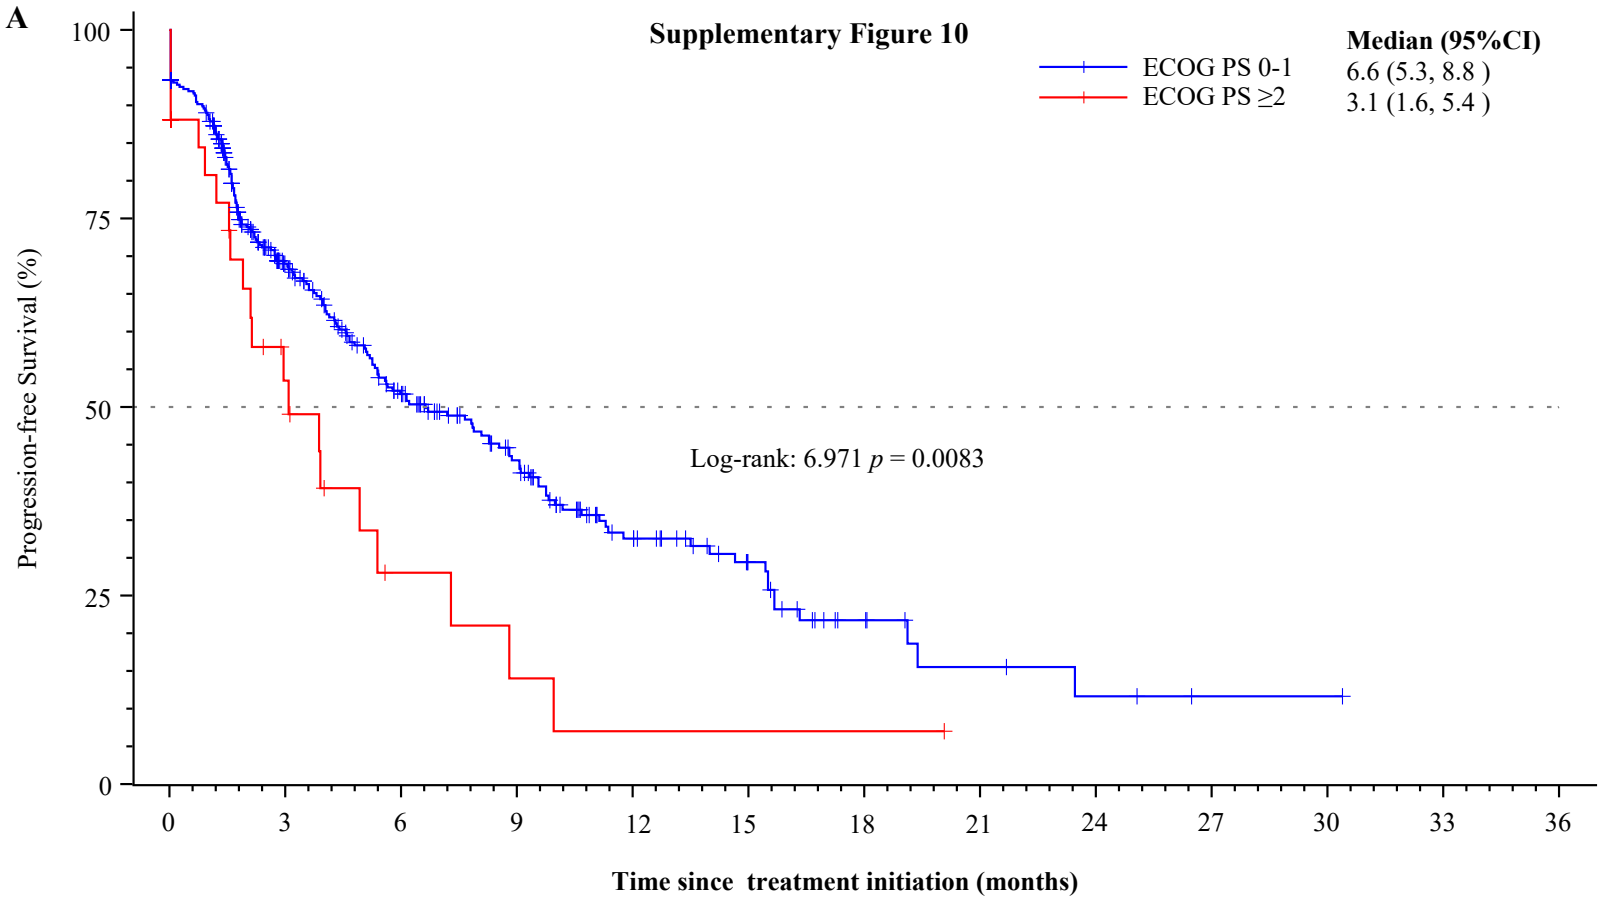

**Number at risk**

|     |     |     |    |    |    |    |   |   |   |   |   |
|-----|-----|-----|----|----|----|----|---|---|---|---|---|
| 448 | 182 | 116 | 77 | 41 | 24 | 10 | 5 | 3 | 1 | 1 | 0 |
| 42  | 12  | 4   | 2  | 1  | 1  | 1  | 0 |   |   |   |   |

**B**

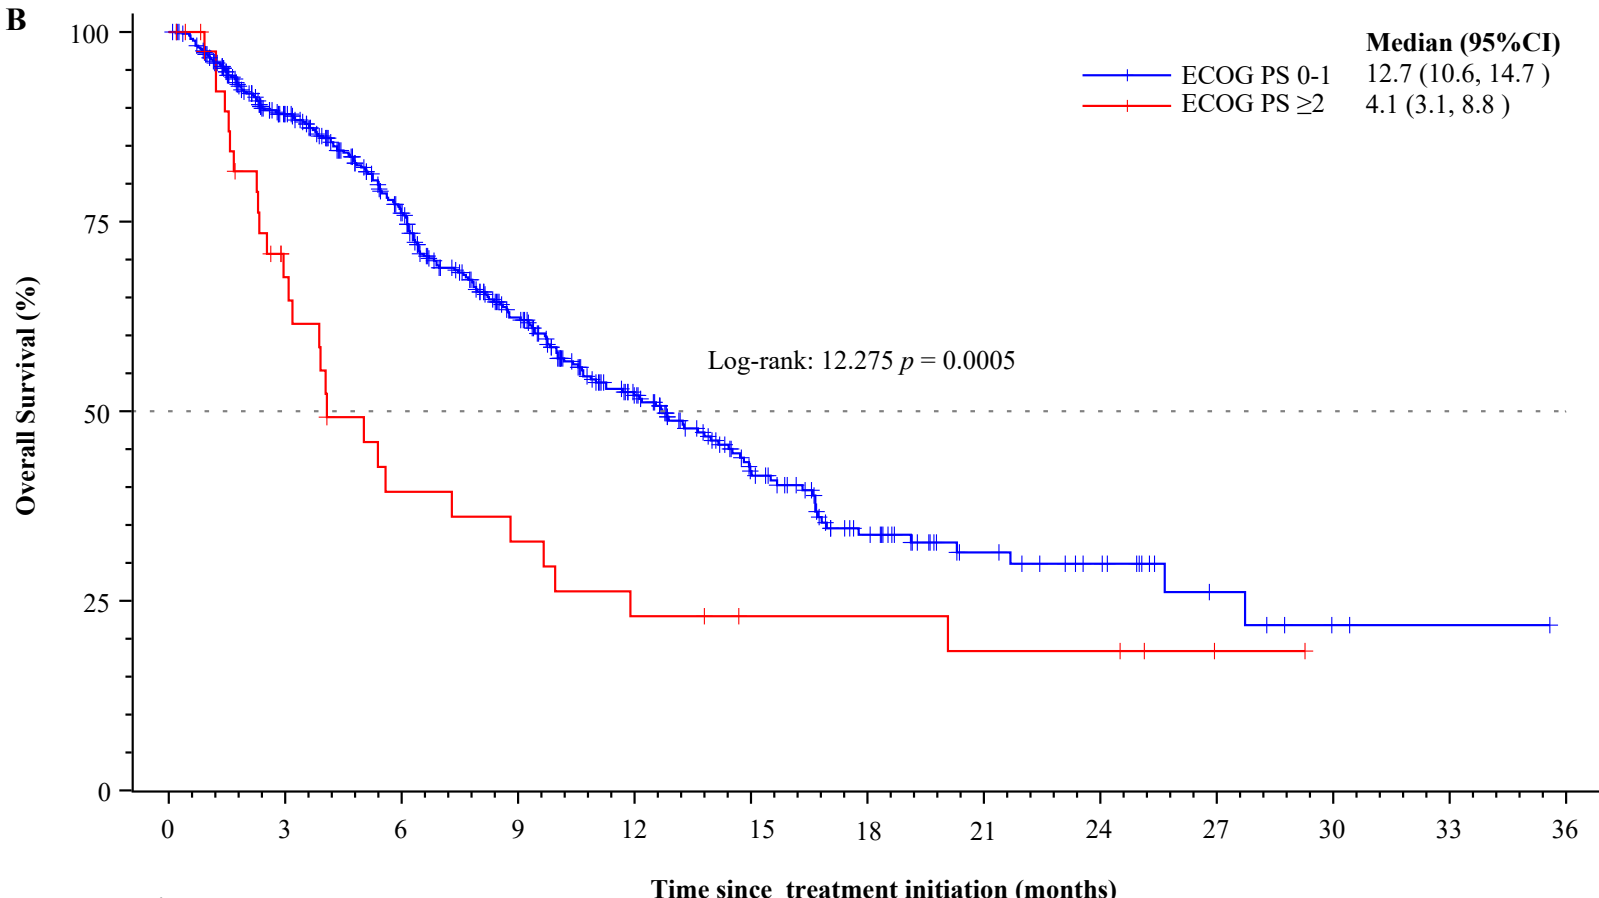

**Number at risk**

|     |     |     |     |     |    |    |    |    |   |   |   |   |
|-----|-----|-----|-----|-----|----|----|----|----|---|---|---|---|
| 448 | 347 | 261 | 182 | 117 | 70 | 40 | 22 | 15 | 6 | 2 | 1 | 0 |
| 42  | 22  | 12  | 10  | 7   | 5  | 5  | 4  | 4  | 1 | 0 |   |   |

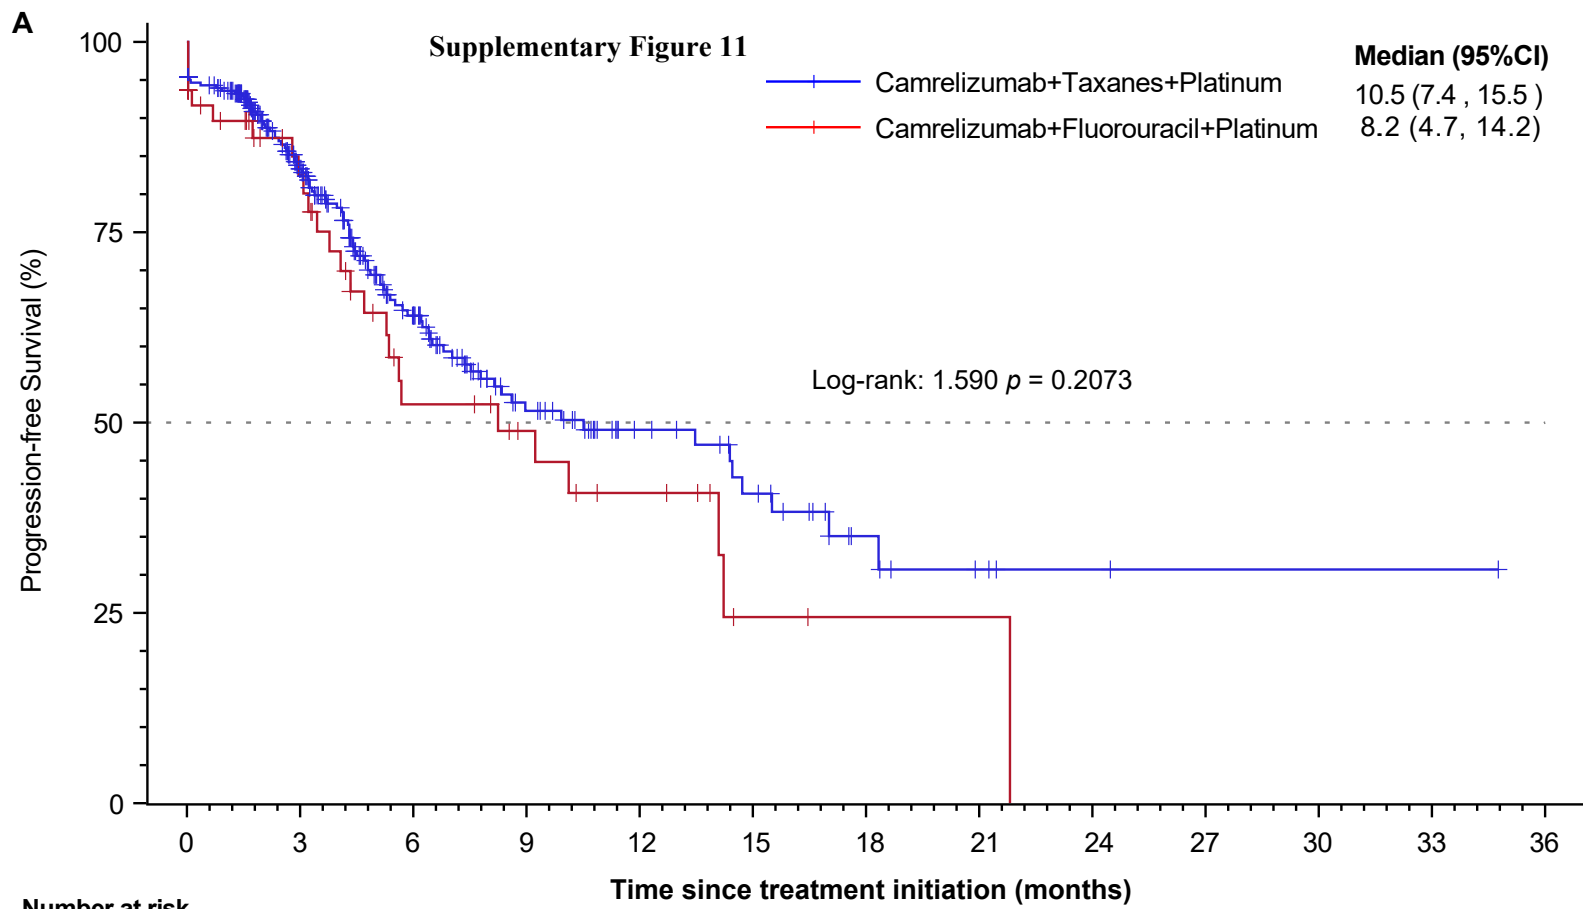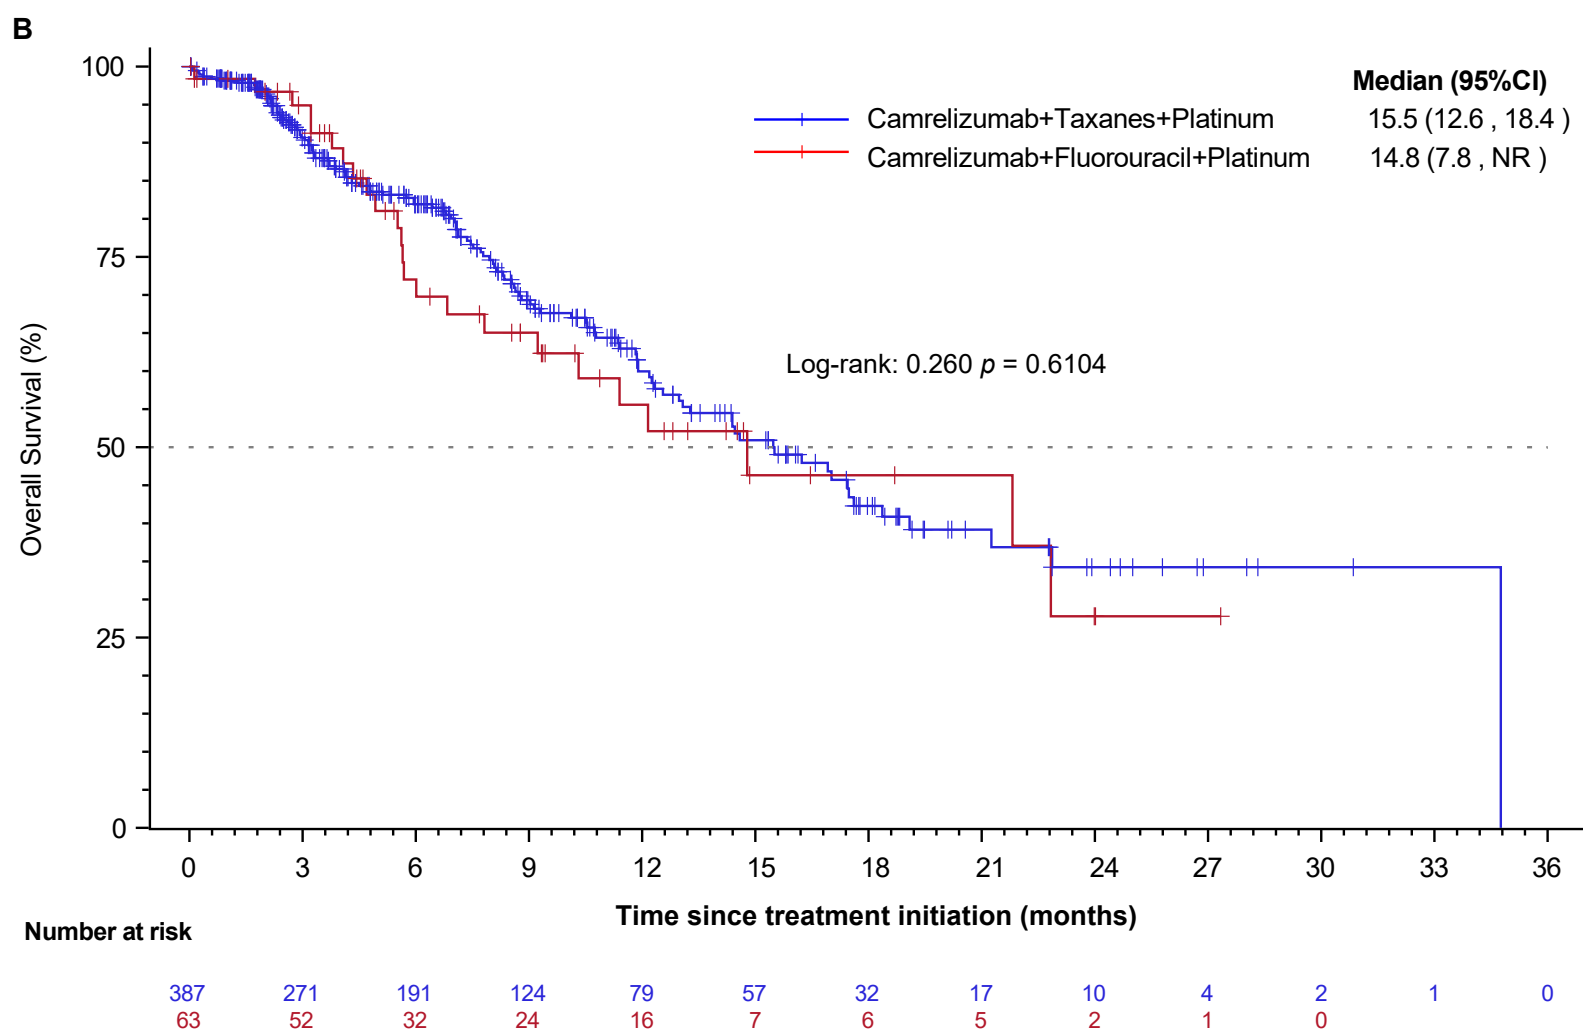

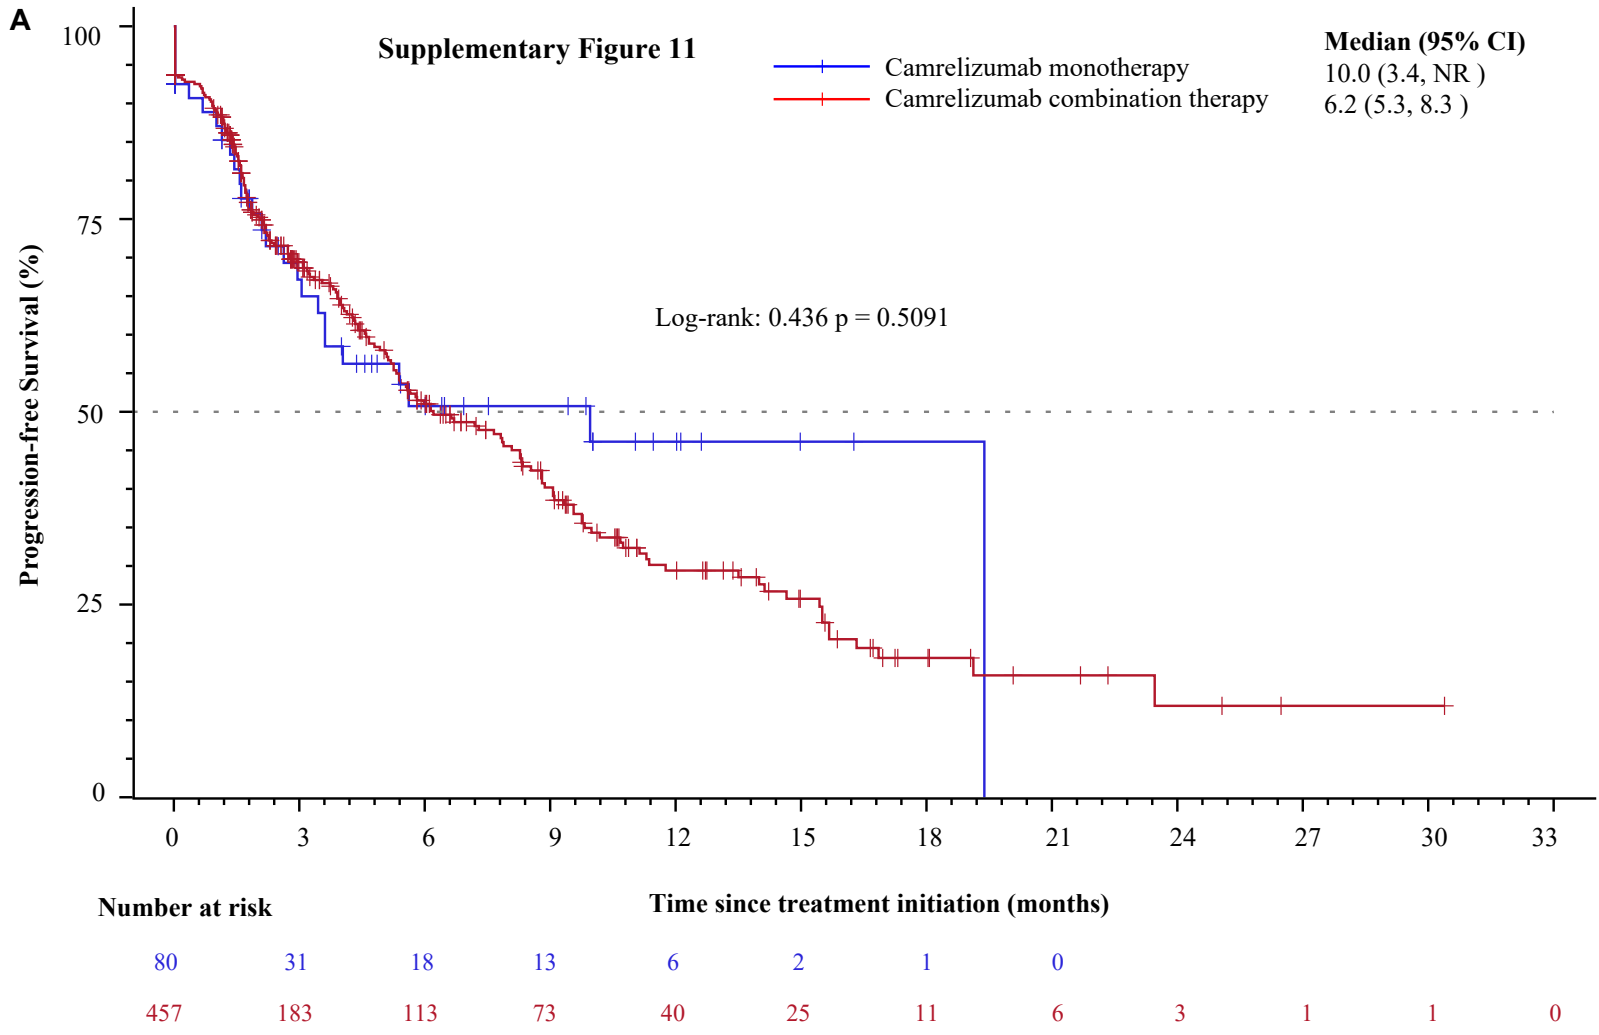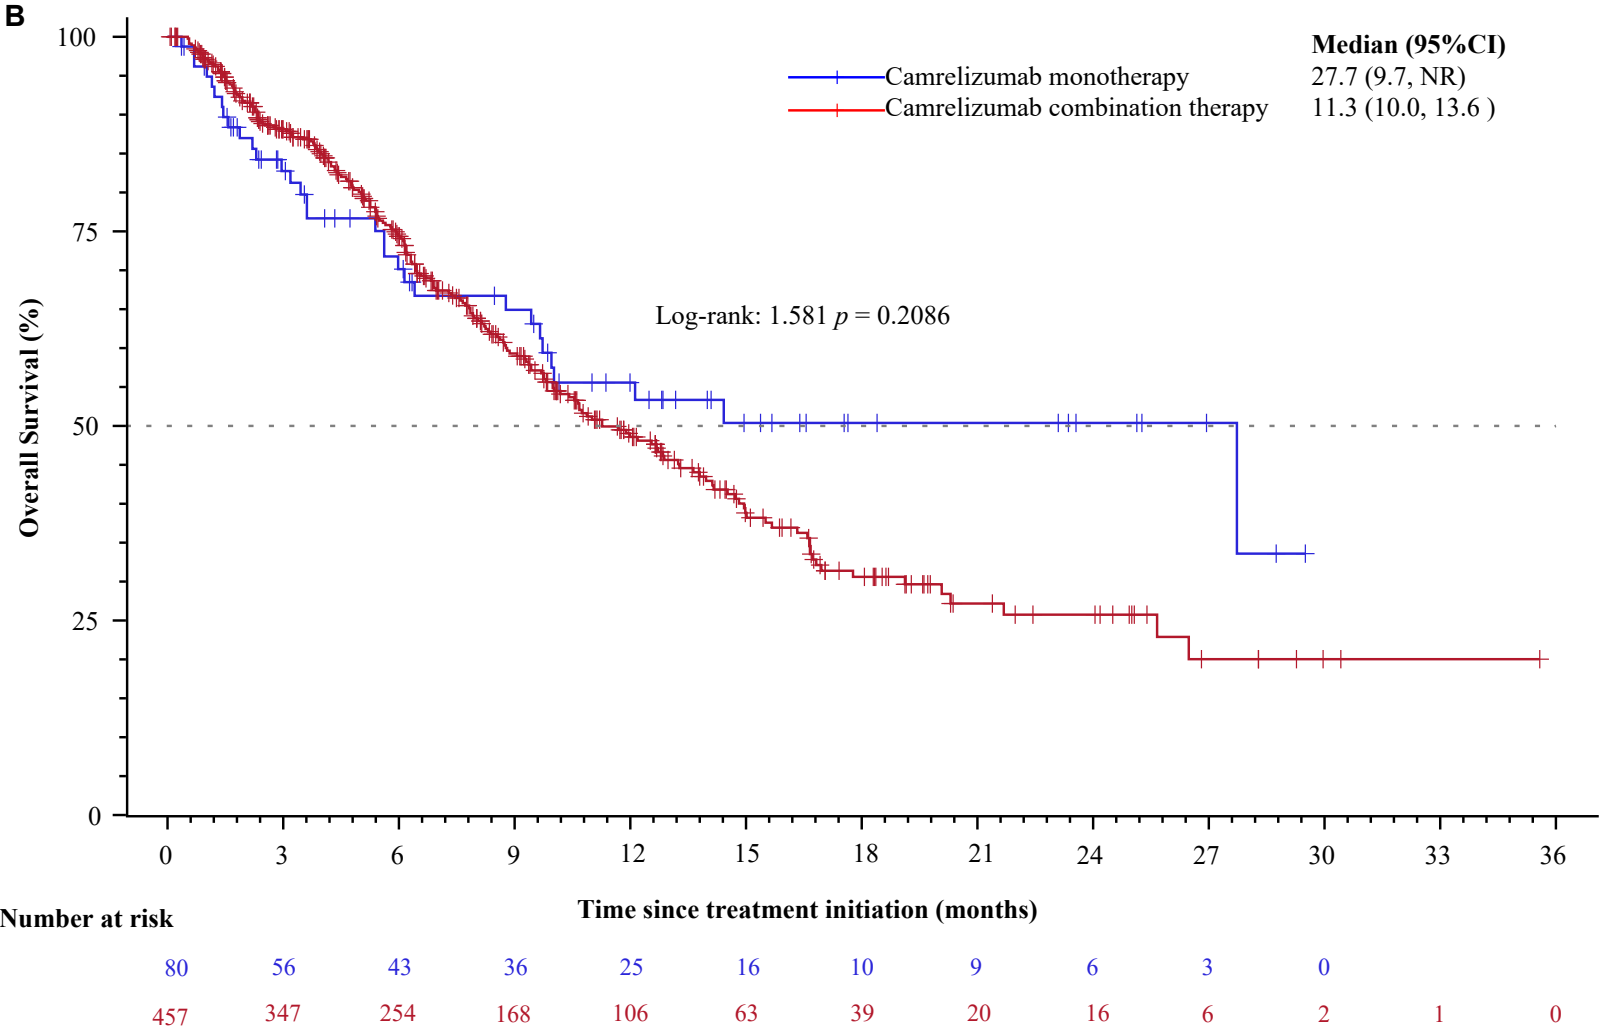

**Supplementary Table 1** Summary of study designs.

|                              | <b>ESCORT-RWS/NCT04616040</b>                                                                                                                                                                                | <b>NOAH-EC201/ChiCTR1900027275</b>                                                                                                                 | <b>ChiCTR2000039499</b>                                                                                                                                                                                            |
|------------------------------|--------------------------------------------------------------------------------------------------------------------------------------------------------------------------------------------------------------|----------------------------------------------------------------------------------------------------------------------------------------------------|--------------------------------------------------------------------------------------------------------------------------------------------------------------------------------------------------------------------|
| Inclusion/exclusion criteria | 1. Age $\geq 18$ years<br>2. Histologically or cytologically confirmed locally advanced unresectable, recurrent or metastatic esophageal cancer<br>3. Eligible for camrelizumab at investigator's discretion | 1. Age $\geq 18$ years<br>2. Histologically or cytologically confirmed esophageal cancer<br>3. At least one measurable lesion<br>4. ECOG PS of 0-2 | 1. Age $\geq 18$ years<br>2. Pathologically confirmed esophageal cancer at clinical stage II-III<br>3. At most one prior systemic therapy<br>4. At least one measurable lesion per RECIST 1.1<br>5. ECOG PS of 0-1 |
| Clinical settings            | First, second, or third line of later                                                                                                                                                                        | First, second, or third line of later                                                                                                              | First or second line                                                                                                                                                                                               |
| Treatment                    | Camrelizumab monotherapy or in combination                                                                                                                                                                   | Camrelizumab-containing regimens                                                                                                                   | Camrelizumab monotherapy or in combination                                                                                                                                                                         |
| Radiologic assessment        | Every 6~8 weeks                                                                                                                                                                                              | Every 3-4 months                                                                                                                                   | Every 6 ( $\pm 1$ ) weeks                                                                                                                                                                                          |
| Follow-up                    | Every 3-6 months                                                                                                                                                                                             | Every 3-6 months                                                                                                                                   | Every 3-6 months                                                                                                                                                                                                   |

**Supplementary Table 2** List of study sites

| No. | Study site                                                                                   | Geographic location | Hospital level | Patients |
|-----|----------------------------------------------------------------------------------------------|---------------------|----------------|----------|
| 1   | Peking University Cancer Hospital                                                            | Beijing             | Tertiary       | 96       |
| 2   | Changzhi People's Hospital Affiliated to Changzhi Medical College                            | Shanxi              | Tertiary       | 68       |
| 3   | Fujian Cancer Hospital, Fujian Medical University Cancer Hospital                            | Fujian              | Tertiary       | 43       |
| 4   | The First Affiliated Hospital of Bengbu Medical College                                      | Anhui               | Tertiary       | 40       |
| 5   | The First Affiliated Hospital of USTC, Anhui Provincial Hospital                             | Anhui               | Tertiary       | 38       |
| 6   | Provincial Hospital Affiliated to Shandong First Medical University                          | Shandong            | Tertiary       | 35       |
| 7   | Suining Central Hospital                                                                     | Sichuan             | Tertiary       | 35       |
| 8   | Anyang Tumor Hospital                                                                        | Henan               | Tertiary       | 33       |
| 9   | Shandong Cancer Hospital and Institute                                                       | Shandong            | Tertiary       | 30       |
| 10  | Affiliated Cancer Hospital of Shanxi Medical University                                      | Shanxi              | Tertiary       | 30       |
| 11  | Anhui Provincial Cancer Hospital                                                             | Anhui               | Tertiary       | 29       |
| 12  | The Second Affiliated Hospital of Anhui Medical University                                   | Anhui               | Tertiary       | 28       |
| 13  | Hubei Cancer Hospital, Tongji Medical College, Huazhong University of Science and Technology | Hubei               | Tertiary       | 21       |
| 14  | The First Affiliated Hospital of Xinxiang Medical University                                 | Henan               | Tertiary       | 20       |
| 15  | Yijishan Hospital of Wannan Medical College                                                  | Anhui               | Tertiary       | 20       |
| 16  | Harbin Medical University Cancer Hospital                                                    | Heilongjiang        | Tertiary       | 19       |
| 17  | The First Affiliated Hospital of Anhui Medical University                                    | Anhui               | Tertiary       | 19       |
| 18  | Ganzhou People's Hospital                                                                    | Jiangxi             | Tertiary       | 18       |
| 19  | Nanyang Central Hospital                                                                     | Henan               | Tertiary       | 17       |
| 20  | Anxi County Hospital                                                                         | Fujian              | Tertiary       | 15       |
| 21  | Cangzhou Central Hospital                                                                    | Hebei               | Tertiary       | 14       |
| 22  | Sichuan Province Hospital                                                                    | Sichuan             | Tertiary       | 12       |
| 23  | Union Hospital, Tongji Medical College, Huazhong University of Science and Technology        | Hubei               | Tertiary       | 12       |
| 24  | The First Affiliated Hospital of Anhui University of Traditional Chinese Medicine            | Anhui               | Tertiary       | 12       |
| 25  | Zhongshan Hospital Affiliated to Xiamen University                                           | Fujian              | Tertiary       | 12       |
| 26  | Lixin County People's Hospital                                                               | Anhui               | Tertiary       | 11       |
| 27  | Zhangzhou Hospital Affiliated to Fujian Medical University                                   | Fujian              | Tertiary       | 11       |
| 28  | China-Japan Union Hospital of Jilin University                                               | Ji Lin              | Tertiary       | 10       |
| 29  | First Hospital of Jilin University                                                           | Ji Lin              | Tertiary       | 10       |
| 30  | Chifeng Cancer Hospital                                                                      | Inner Mongolia      | Tertiary       | 10       |
| 31  | Affiliated Hospital of Chifeng University                                                    | Inner Mongolia      | Tertiary       | 10       |
| 32  | Cancer Hospital affiliated to Shantou University Medical College                             | Guangdong           | Tertiary       | 9        |
| 33  | Putian University Affiliated Hospital                                                        | Fujian              | Tertiary       | 9        |
| 34  | West China Hospital of Sichuan University                                                    | Sichuan             | Tertiary       | 8        |
| 35  | Tongling People's Hospital                                                                   | Anhui               | Tertiary       | 8        |
| 36  | Guangdong Provincial Hospital of Traditional Chinese Medicine                                | Guangdong           | Tertiary       | 7        |
| 37  | The First Hospital of Putian                                                                 | Fujian              | Tertiary       | 7        |



|    |                                                                                                                         |           |           |   |
|----|-------------------------------------------------------------------------------------------------------------------------|-----------|-----------|---|
| 38 | The 900th Hospital of the Joint Logistics Support Force of the Chinese People's Liberation Army Putian Medical District | Fujian    | Tertiary  | 7 |
| 39 | Henan Provincial People's Hospital                                                                                      | Henan     | Tertiary  | 6 |
| 40 | Xin Hua Hospital Affiliated to Shanghai Jiao Tong University School of Medicine                                         | Shanghai  | Tertiary  | 6 |
| 41 | The 901st Hospital of the Joint Logistics Support Force of the Chinese People's Liberation Army                         | Anhui     | Tertiary  | 6 |
| 42 | Quanzhou First Hospital Affiliated to Fujian Medical University                                                         | Fujian    | Tertiary  | 6 |
| 43 | Sun Yat-Sen Memorial Hospital, Sun Yat-Sen University                                                                   | Guangdong | Tertiary  | 5 |
| 44 | Jiangsu Province Hospital                                                                                               | Jiangsu   | Tertiary  | 5 |
| 45 | Tianjin Medical University Cancer Institute & Hospital                                                                  | Tianjin   | Tertiary  | 5 |
| 46 | The Affiliated Hospital of Qingdao University                                                                           | Shandong  | Tertiary  | 5 |
| 47 | Jinshan Hospital of Fudan University                                                                                    | Shanghai  | Tertiary  | 5 |
| 48 | Fuyang People's Hospital                                                                                                | Anhui     | Tertiary  | 5 |
| 49 | Huaibei People's Hospital                                                                                               | Anhui     | Tertiary  | 5 |
| 50 | Fexi People's Hospital                                                                                                  | Anhui     | Tertiary  | 5 |
| 51 | The First Affiliated Hospital of Xiamen University                                                                      | Fujian    | Tertiary  | 5 |
| 52 | The Third Affiliated Hospital, Sun Yat-Sen University                                                                   | Guangdong | Secondary | 4 |
| 53 | The Second Affiliated Hospital of Soochow University                                                                    | Jiangsu   | Secondary | 4 |
| 54 | The Hospital of Suixi County                                                                                            | Anhui     | Secondary | 4 |
| 55 | Wangjiang People's Hospital of Anhui                                                                                    | Anhui     | Secondary | 4 |
| 56 | The Second Affiliated Hospital of Xiamen Medical College                                                                | Fujian    | Tertiary  | 4 |
| 57 | Fujian Medical University Union Hospital                                                                                | Fujian    | Secondary | 4 |
| 58 | Beijing Luhe Hospital, Capital Medical University                                                                       | Beijing   | Secondary | 3 |
| 59 | Henan Cancer Hospital, Affiliated Cancer Hospital of Zhengzhou University                                               | Henan     | Tertiary  | 3 |
| 60 | The Second Affiliated Hospital of Xi'an Jiaotong University                                                             | Shaanxi   | Tertiary  | 3 |
| 61 | Hainan Cancer Hospital                                                                                                  | Hainan    | Secondary | 3 |
| 62 | Panjin central hospital                                                                                                 | Liaoning  | Tertiary  | 3 |
| 63 | Xuancheng People's Hospital                                                                                             | Anhui     | Tertiary  | 3 |
| 64 | The First People's Hospital of Chuzhou                                                                                  | Anhui     | Tertiary  | 3 |
| 65 | The 910th Hospital of the Joint Logistics Support Force of the Chinese People's Liberation Army                         | Fujian    | Secondary | 3 |
| 66 | The First Affiliated Hospital of Nanchang University                                                                    | Jiangxi   | Secondary | 2 |
| 67 | Beijing Daxing District People's Hospital                                                                               | Beijing   | Tertiary  | 2 |
| 68 | Beijing Tsinghua Changgung Hospital                                                                                     | Beijing   | Tertiary  | 2 |
| 69 | Wan Bei General Hospital of Wanbei Coal Power Group                                                                     | Anhui     | Tertiary  | 2 |
| 70 | Guangde Hospital of Traditional Chinese Medicine                                                                        | Anhui     | Tertiary  | 2 |
| 71 | The Second People's Hospital of Huaiyuan                                                                                | Anhui     | Secondary | 2 |
| 72 | Huaibei Miner General Hospital                                                                                          | Anhui     | Tertiary  | 2 |
| 73 | Fengyang County People's Hospital                                                                                       | Anhui     | Secondary | 2 |
| 74 | The Second Affiliated Hospital of Bengbu Medical College                                                                | Anhui     | Tertiary  | 2 |
| 75 | Nanping First Hospital, Fujian Medical University                                                                       | Fujian    | Tertiary  | 2 |
| 76 | The Second Affiliated Hospital of Fujian Medical University                                                             | Fujian    | Tertiary  | 2 |
| 77 | The First Affiliated Hospital of Henan University                                                                       | Henan     | Tertiary  | 1 |

|    |                                                                                                 |        |           |   |
|----|-------------------------------------------------------------------------------------------------|--------|-----------|---|
| 78 | Fuyang Cancer Hospital                                                                          | Anhui  | Tertiary  | 1 |
| 79 | Huaiyuan People's Hospital                                                                      | Anhui  | Tertiary  | 1 |
| 80 | Shexian People's Hospital                                                                       | Anhui  | Tertiary  | 1 |
| 81 | Guangde People's Hospital                                                                       | Anhui  | Tertiary  | 1 |
| 82 | Fuyang Hospital of Anhui Medical University                                                     | Anhui  | Tertiary  | 1 |
| 83 | Suzhou Municipal Hospital                                                                       | Anhui  | Tertiary  | 1 |
| 84 | Ma'anshan 17th Metallurgical Hospital                                                           | Anhui  | Tertiary  | 1 |
| 85 | The people's hospital of Susong                                                                 | Anhui  | Tertiary  | 1 |
| 86 | The second People's Hospital of Anhui                                                           | Anhui  | Tertiary  | 1 |
| 87 | Huoqiu First People's Hospital                                                                  | Anhui  | Tertiary  | 1 |
| 88 | The 909th Hospital of the Joint Logistics Support Force of the Chinese People's Liberation Army | Fujian | Tertiary  | 1 |
| 89 | Mindong Hospital of Ningde City                                                                 | Fujian | Tertiary  | 1 |
| 90 | Longyan Second Hospital                                                                         | Fujian | Tertiary  | 1 |
| 91 | Sanming First Hospital                                                                          | Fujian | Secondary | 1 |

**Supplementary Table 3** Adverse events occurring in  $\geq 5\%$  of patients.

|                                                        | <b>Total<br/>(n=987)</b> |
|--------------------------------------------------------|--------------------------|
| <b>Any adverse events, n (%)</b>                       | 735 (74.5)               |
| Anemia                                                 | 295 (29.9)               |
| White blood cells decreased                            | 275 (27.9)               |
| Neutrophil count decreased                             | 193 (19.6)               |
| Platelet count decreased                               | 158 (16.0)               |
| Nausea                                                 | 128 (13.0)               |
| Lymphocyte count decreased                             | 107 (10.8)               |
| Reactive cutaneous capillary endothelial proliferation | 98 (9.9)                 |
| Vomiting                                               | 86 (8.7)                 |
| Weight loss                                            | 70 (7.1)                 |
| Fatigue                                                | 69 (7.0)                 |
| Decreased appetite                                     | 65 (6.6)                 |
| Cough                                                  | 64 (6.5)                 |
| COVID-19 infection                                     | 64 (6.5)                 |
| Infectious pneumonia                                   | 63 (6.4)                 |
| Hypoalbuminemia                                        | 61 (6.2)                 |
| Hypokalemia                                            | 58 (5.9)                 |
| Hypoproteinemia                                        | 50 (5.1)                 |
| Aspartate aminotransferase increased                   | 50 (5.1)                 |

**Supplementary Table 4** Adverse events occurring in  $\geq 5\%$  of patients aged  $\geq 75$  years.

|                                                        | <b>Age<math>\geq 75</math> years<br/>(n=131)</b> |
|--------------------------------------------------------|--------------------------------------------------|
| <b>Any adverse events, n (%)</b>                       | 91 (69.5)                                        |
| Anemia                                                 | 27 (20.6)                                        |
| White blood cells decreased                            | 21 (16.0)                                        |
| Nausea                                                 | 15 (11.5)                                        |
| Reactive cutaneous capillary endothelial proliferation | 14 (10.7)                                        |
| Platelet count decreased                               | 14 (10.7)                                        |
| Lymphocyte count decreased                             | 13 (9.9)                                         |
| Neutrophil count decreased                             | 13 (9.9)                                         |
| Fever                                                  | 12 (9.2)                                         |
| Cough                                                  | 11 (8.4)                                         |
| Infectious pneumonia                                   | 9 (6.9)                                          |
| Vomiting                                               | 9 (6.9)                                          |
| Weight loss                                            | 9 (6.9)                                          |
| Covid-19 infection                                     | 9 (6.9)                                          |
| Fatigue                                                | 8 (6.1)                                          |
| Hypokalemia                                            | 7 (5.3)                                          |

**Supplementary Table 5** Adverse events occurring in  $\geq 5\%$  of patients with an ECOG PS of  $\geq 2$ .

|                                  | ECOG PS $\geq 2$<br>(n=63) |
|----------------------------------|----------------------------|
| <b>Any adverse events, n (%)</b> | 44 (69.8)                  |
| Anemia                           | 19 (30.2)                  |
| White blood cells decreased      | 10 (15.9)                  |
| Vomiting                         | 10 (15.9)                  |
| Nausea                           | 7 (11.1)                   |
| Cough                            | 7 (11.1)                   |
| Lymphocyte count decreased       | 7 (11.1)                   |
| Infectious pneumonia             | 6 (9.5)                    |
| Neutrophil count decreased       | 6 (9.5)                    |
| Dysphagia                        | 5 (7.9)                    |
| Diarrhea                         | 4 (6.3)                    |
| Productive cough                 | 4 (6.3)                    |
| Pleural effusion                 | 4 (6.3)                    |

**Supplementary Table 6** Peripheral blood parameters used in Cox regression analyses

| Variables | Full name                      | Normal value or range | Unit        |
|-----------|--------------------------------|-----------------------|-------------|
| ALB       | Albumin                        | $\geq 35$             | g/L         |
| ALP       | Alkaline phosphatase           | 40~160                | U/L         |
| ALT       | Alanine aminotransferase       | 0~40                  | U/L         |
| AMS       | Amylase                        | 0~110                 | IU/L        |
| ANC       | Absolute neutrophil count      | 2~8                   | $10^9/L$    |
| AST       | Aspartate aminotransferase     | 0~45                  | U/L         |
| CEA       | Carcinoembryonic antigen       | <5                    | ng/ml       |
| Cr        | Creatinine                     | 50~130                | umol/L      |
| DBIL      | Direct bilirubin               | 0~6                   | umol/L      |
| EOSO      | Eosinophils                    | 0.05 ~ 0.5            | $10^9/L$    |
| GGT       | Gamma-glutamyltransferase      | 10~50                 | IU/L        |
| GLU       | Glucose                        | 3.6~6.1               | mmol/L      |
| Hb        | Hemoglobin                     | $\geq 90$             | g/L         |
| HDL       | High-density lipoprotein       | 0.7~2.0               | mmol/L      |
| LDH       | Lactate dehydrogenase          | <240                  | U/L         |
| LDL       | Low-density lipoprotein        | $\leq 3.37$           | mmol/L      |
| LMR       | Lymphocyte-to-monocyte ratio   | $\geq 3.5$            | ratio       |
| LY        | Lymphocyte                     | 1~5                   | $10^9/L$    |
| MONO      | Monocyte                       | 0.12 ~ 0.8            | $10^9/L$    |
| NLR       | Neutrophil to lymphocyte ratio | <3                    | ratio       |
| PLR       | Platelet to lymphocyte ratio   | <173.7                | ratio       |
| PLT       | Platelet count                 | 100~350               | $10^9/L$    |
| RBC       | Red blood cells                | 3.5~5.5               | $10^{12}/L$ |
| TBIL      | Total bilirubin                | 1.7~20                | umol/L      |
| TP        | Total protein                  | 60~80                 | g/L         |
| TSH       | Thyroid-stimulating hormone    | 2~10                  | mU/L        |
| WBC       | White blood cells              | 4~10                  | $10^9/L$    |

**Supplementary Table 7** Multiple multivariable Cox regression model for overall survival analysis

| Explanatory variables<br>(normal vs abnormal) | HR (95% CI)       | <i>p</i> value*  | FDR adjusted <i>p</i> value |
|-----------------------------------------------|-------------------|------------------|-----------------------------|
| LMR <sup>#</sup>                              | 0.22 (0.09,0.50)  | <b>&lt;0.001</b> | <b>0.011</b>                |
| HDL                                           | 1.27 (0.51,3.91)  | 0.643            | 0.821                       |
| RBC                                           | 0.72 (0.53,1.00)  | <b>0.043</b>     | 0.194                       |
| ALB                                           | 0.54 (0.38,0.78)  | <b>&lt;0.001</b> | <b>0.011</b>                |
| PLT                                           | 0.67 (0.47,0.97)  | <b>0.028</b>     | 0.150                       |
| PLR <sup>#</sup>                              | 0.36 (0.18,0.67)  | <b>0.003</b>     | <b>0.023</b>                |
| CEA                                           | 0.76 (0.52,1.12)  | 0.147            | 0.320                       |
| AST                                           | 0.82 (0.49,1.46)  | 0.469            | 0.636                       |
| Mono                                          | 0.73 (0.50,1.11)  | 0.122            | 0.320                       |
| ALT                                           | 0.71 (0.45,1.20)  | 0.173            | 0.330                       |
| LDH                                           | 0.70 (0.47,1.07)  | 0.092            | 0.320                       |
| TP                                            | 0.75 (0.52,1.11)  | 0.136            | 0.320                       |
| NLR                                           | 0.65 (0.48,0.88)  | <b>0.006</b>     | <b>0.039</b>                |
| Cr <sup>#</sup>                               | 0.54 (0.26,1.22)  | 0.113            | 0.320                       |
| LDL                                           | 1.43 (0.86,2.50)  | 0.184            | 0.330                       |
| GGT                                           | 0.82 (0.55,1.23)  | 0.320            | 0.541                       |
| LY                                            | 0.81 (0.61,1.08)  | 0.154            | 0.320                       |
| DBIL                                          | 1.11 (0.71,1.81)  | 0.669            | 0.821                       |
| ALP                                           | 0.97 (0.54,1.94)  | 0.931            | 0.963                       |
| ANC                                           | 0.93 (0.65,1.37)  | 0.700            | 0.821                       |
| TSH <sup>#</sup>                              | 0.53 (0.22,1.19)  | 0.139            | 0.320                       |
| Hb                                            | 1.05 (0.60,2.04)  | 0.864            | 0.963                       |
| AMS                                           | 2.04 (0.52,13.98) | 0.374            | 0.594                       |
| EOSO                                          | 1.13 (0.85,1.52)  | 0.407            | 0.611                       |
| WBC                                           | 0.99 (0.75,1.31)  | 0.963            | 0.963                       |
| TBIL                                          | 0.99 (0.59,1.79)  | 0.959            | 0.963                       |
| GLU                                           | 1.15 (0.79,1.72)  | 0.471            | 0.636                       |

**Note:** HR, Hazard ratios; ECOG PS, Eastern Cooperative Oncology Group performance status; LMR, Lymphocyte to monocyte ratio; HDL, High-density lipoprotein; RBC: Red blood cells; ALB, Albumin; PLT, Platelet count; PLR, Platelet to lymphocyte ratio; CEA, Carcinoembryonic antigen; AST, Aspartate aminotransferase; MONO, Monocyte; ALT, Alanine aminotransferase; LDH, Lactate dehydrogenase; TP, Total protein; NLR, Neutrophil to lymphocyte ratio; Cr, Creatinine; LDL, Low-density lipoprotein; GGT, Gamma-glutamyltransferase; LY, Lymphocyte; DBIL, Direct bilirubin; ALP, Alkaline phosphatase; ANC, Absolute neutrophil count; TSH, Thyroid stimulating hormone; Hb, Hemoglobin; AMS, Amylase; EOSO, Eosinophils; WBC, White blood cells; TBIL, Total bilirubin; GLU, Glucose.

\*Adjusted for baseline patient characteristics (age, sex, smoking status, drinking status, primary tumor location, liver metastases, lung metastases, bone metastases, line of therapy, and camrelizumab treatment patterns). <sup>#</sup>Proportional hazards assumption is not met in the raw Cox model, and time-dependent covariate CovT=Cov\*(log(time)) is

introduced in the final Cox model.



**Supplementary Table 8** Summary of effectiveness outcomes of camrelizumab for advanced esophageal cancer in this study and pivotal clinical trials

|                              | Pooled analysis <sup>*#</sup> |                              |                              | ESCORT-1st                   | Zhang et al. 2020 <sup>*</sup> | ESCORT                       | CAP 02                      |
|------------------------------|-------------------------------|------------------------------|------------------------------|------------------------------|--------------------------------|------------------------------|-----------------------------|
|                              | 1 <sup>st</sup> line (n=450)  | 2 <sup>nd</sup> line (n=398) | 3 <sup>rd</sup> line (n=139) | 1 <sup>st</sup> line (n=298) | 1 <sup>st</sup> line (n=30)    | 2 <sup>nd</sup> line (n=228) | 2 <sup>nd</sup> line (n=52) |
| Treatment patterns           | Cam/Cam+                      | Cam/Cam+                     | Cam/Cam+                     | Cam+TP                       | Cam+TP+Apa                     | Cam                          | Cam+Apa                     |
| Median follow-up (IQR), mons | 8.7 (7.1, 9.6)                | 12.0 (10.4, 12.9)            | 11.7 (9.1, 13.8)             | 10.8 (7.3, 14.3)             | 25.0 (23.1, 26.2)              | 8.3 (4.1, 12.8)              | 7.5 (4.0, 11.2)             |
| Median OS (95% CI), mons     | 15.5 (12.6, 18.4)             | 12.1 (10.0, 14.7)            | 10.9 (8.1, 14.5)             | 15.3 (12.8, 17.3)            | 19.4 (9.9, NR)                 | 8.3 (6.8, 9.7)               | 15.8 (8.4, 16.2)            |
| Median PFS (95% CI), mons    | 9.9 (7.4, 14.4)               | 6.6 (5.1, 8.8)               | 5.7 (3.1, 9.6)               | 6.9 (5.8, 7.4)               | 6.9 (4.5, 14.2)                | 1.9 (1.9, 2.4)               | 6.8 (3.8, 10.4)             |
| ORR (95% CI)                 | 45.5 (40.0, 51.0)             | 29.0 (23.9, 34.5)            | 22.9 (15.0, 32.6)            | 72.1 (66.7, 77.2)            | 80.0 (61.4, 92.3)              | 20.2 (15.2, 26.0)            | 34.6 (22.0, 49.1)           |
| DCR (95% CI)                 | 90.1 (86.3, 93.1)             | 79.5 (74.4, 83.9)            | 68.8 (58.5, 77.8)            | 91.3 (87.5, 94.2)            | 96.7 (82.8, 99.9)              | 44.7 (38.2, 51.4)            | 78.8 (65.3, 88.9)           |

**Note:** \*Median follow-up is expressed as median and 95% confidence interval. #ORR and DCR are analyzed in the EAS population, otherwise in the ITT population. Cam, Camrelizumab monotherapy; Cam+: Camrelizumab in combination with other agents; TP, Paclitaxel and cisplatin; Apa, Apatinib; ITT, Intention to treat population; EAS, Effectiveness analysis set. IQR, Interquartile range; 95% CI, Confidence interval; ORR, Objective response rate; DCR, Disease control rate; PFS, Progression-free survival; OS, Overall survival.
